# Supplementary material for: Observational study of the status of coronary risk biomarkers among Negritos with metabolic syndrome in the east coast of Malaysia
Source: PubMed Central journal article supplement — BMJ Open. 2018 Dec 4;8(12):e021580. doi: 10.1136/bmjopen-2018-021580 (PMC6286619; doi:10.1136/bmjopen-2018-021580), 2018-12-04
Supplement: bmjopen-2018-021580.draft_revisions.pdf [file bmjopen-2018-021580.draft_revisions.pdf]

# BMJ Open

BMJ Open is committed to open peer review. As part of this commitment we make the peer review history of every article we publish publicly available.

When an article is published we post the peer reviewers' comments and the authors' responses online. We also post the versions of the paper that were used during peer review. These are the versions that the peer review comments apply to.

The versions of the paper that follow are the versions that were submitted during the peer review process. They are not the versions of record or the final published versions. They should not be cited or distributed as the published version of this manuscript.

BMJ Open is an open access journal and the full, final, typeset and author-corrected version of record of the manuscript is available on our site with no access controls, subscription charges or pay-per-view fees (<http://bmjopen.bmj.com>).

If you have any questions on BMJ Open's open peer review process please email [info.bmjopen@bmj.com](mailto:info.bmjopen@bmj.com)

# BMJ Open

## Status of Inflammation, Endothelial Activation and Prothrombogenesis among Negritos with Metabolic Syndrome

|                               |                                                                                                                                                                                                                                                                                                                                                                                                                                                                                                                                                                                                                                                                                                                           |
|-------------------------------|---------------------------------------------------------------------------------------------------------------------------------------------------------------------------------------------------------------------------------------------------------------------------------------------------------------------------------------------------------------------------------------------------------------------------------------------------------------------------------------------------------------------------------------------------------------------------------------------------------------------------------------------------------------------------------------------------------------------------|
| Journal:                      | <i>BMJ Open</i>                                                                                                                                                                                                                                                                                                                                                                                                                                                                                                                                                                                                                                                                                                           |
| Manuscript ID                 | bmjopen-2018-021580                                                                                                                                                                                                                                                                                                                                                                                                                                                                                                                                                                                                                                                                                                       |
| Article Type:                 | Research                                                                                                                                                                                                                                                                                                                                                                                                                                                                                                                                                                                                                                                                                                                  |
| Date Submitted by the Author: | 11-Jan-2018                                                                                                                                                                                                                                                                                                                                                                                                                                                                                                                                                                                                                                                                                                               |
| Complete List of Authors:     | Mohd Mokhsin, Nurul Atiqah; Universiti Teknologi MARA, Faculty of Medicine<br>Mokhtar, Siti Shuhada; Universiti Teknologi MARA, Faculty of Medicine<br>Mohd Ismail, Aletza; Universiti Teknologi MARA, Faculty of Medicine<br>M. Nor, Fadzilah; Universiti Teknologi MARA, Faculty of Medicine<br>Shaari, Syahrul Azlin; Universiti Teknologi MARA, Faculty of Medicine<br>Nawawi, Hapizah; Universiti Teknologi MARA, Institute of Pathology, Forensic and Laboratory Medicine (I-PPerForM)<br>Yusoff, Khalid; UCSI University, Faculty of Medicine and Health Sciences<br>Rahman, Thuhairah; Universiti Teknologi MARA, Faculty of Medicine<br>Hoh, Boon Peng; UCSI University, Faculty of Medicine and Health Sciences |
| Keywords:                     | Lipid disorders < DIABETES & ENDOCRINOLOGY, Hypertension < CARDIOLOGY, EPIDEMIOLOGY                                                                                                                                                                                                                                                                                                                                                                                                                                                                                                                                                                                                                                       |
|                               |                                                                                                                                                                                                                                                                                                                                                                                                                                                                                                                                                                                                                                                                                                                           |

SCHOLARONE™  
Manuscripts

Only

# Status of Inflammation, Endothelial Activation and Prothrombogenesis among Negritos with Metabolic Syndrome

Atiqah Mokhsin<sup>1</sup>, Siti Shuhada Mokhtar<sup>1</sup>, Aletza Mohd. Ismail<sup>1</sup>, Fadzilah M. Nor<sup>1</sup>, Syahrul Azlin Shaari<sup>1</sup>, Hapizah Nawawi<sup>2</sup>, Khalid Yusoff<sup>3</sup>, Thuhairah Rahman<sup>1</sup>, Boon Peng Hoh<sup>3</sup>

<sup>1</sup>Faculty of Medicine, Universiti Teknologi MARA, 47000 Sungai Buloh, Selangor, Malaysia

<sup>2</sup>Institute of Pathology, Forensic and Laboratory Medicine (I-PPerForM), Universiti Teknologi MARA, 47000 Sungai Buloh, Selangor, Malaysia

<sup>3</sup>Faculty of Medicine and Health Sciences, UCSI University, Jalan Menara Gading, Taman Connaught 56000 Kuala Lumpur, Wilayah Persekutuan Kuala Lumpur, Malaysia

## Correspondence:

1) Thuhairah Hasrah Abdul Rahman (Assigned corresponding author)

Faculty of Medicine, Universiti Teknologi MARA, Jalan Hospital, 47000 Sungai Buloh, Selangor

Tel : +603-61267637

Fax : +603-61265212

tootie74@yahoo.com

2) Hoh Boon Peng

Faculty of Medicine and Health Sciences, Jalan Menara Gading, Taman Connaught, 56000 Kuala Lumpur, Wilayah Persekutuan Kuala Lumpur, Malaysia

Tel: +603-91018880 (ext 3725)

Fax: +603-91023606

hohbp@ucsiuniversity.edu.my; hoh.boonpeng@gmail.com

Word count: 2,985 words

## ABSTRACT

**Aims:** To determine the prevalence of MS, ascertain the status of coronary risk biomarkers and establish the independent predictors of these biomarkers among the Negritos.

**Methods:** Diagnosis of MS was made based on the International Diabetes Federation criteria. Serum samples were collected for analysis of inflammatory (hsCRP), endothelial activation (sICAM-1) and prothrombogenesis [Lp(a)] biomarkers in Negritos (n=150) from three inland settlements in East Coast Malaysia and Malays in Malaysia (n=1,227) recruited between 2010 and 2015.

**Results:** MS was significantly higher among the Malays compared to Negritos (21% vs 7%). Amongst the Malays, MS subjects had higher hsCRP ( $p=0.01$ ) and sICAM-1 ( $p<0.05$ ) than their non-MS counterpart.

There were no significant differences in all the biomarkers between MS and the non-MS Negritos. Binary logistic regression analysis affirmed that Negritos were an independent predictor for Lp(a) concentration ( $p<0.001$ ).

**Conclusion:** This study suggests that there may possibly be an underlying genetic influence other than lifestyle which could explain the lack of increased coronary risk in MS Negritos compared to their non-MS counterpart and for Negritos predicting Lp(a).

**Keywords:** Orang Asli; Aborigines; Coronary Artery Disease; Hypertension; Hypercholesterolaemia; Lp(a)

## ARTICLE SUMMARY

### Strengths and limitations of this study

- Metabolic syndrome (MS) is a cluster of metabolic disturbances such as central obesity, glucose intolerance, dyslipidaemia and hypertension, all of which are risk factors for coronary artery disease (CAD) and had established the association with MS and higher levels of biomarkers of atherogenesis which includes inflammation, endothelial activation, oxidative stress and prothrombogenesis.
- Despite MS becoming a major public health concern with extensive data on this syndrome worldwide, report on the prevalence of MS and the status of the biomarkers reflecting inflammation, endothelial activation and prothrombogenesis among Negrito (smallest population and the earliest tribe with a nomadic lifestyle and the least affected by urbanization of indigenous people in Malaysia) remain scarce.
- Interestingly, our research showed no difference in biomarker levels {inflammation (hsCRP), endothelial activation (sICAM) and prothrombogenesis [Lp(a)]} between MS and non-MS Negritos unlike comparison made between these groups among Malays, where biomarkers were higher in MS than non-MS indicating despite isolation from urbanization suggesting healthier lifestyle habits, there was no added risk to CAD among the MS subjects compared to leaner non-MS counterpart. In addition, Regression Analysis showed that Negrito independently predicted Lp(a).
- The possible explanation to this discrepancy is that perhaps genetics are stronger at play in atheroprotection in the face of several assaulting coronary risks and influence surpasses any form of impact by diet and lifestyle which needs further exploration.

### Ethics

1  
2  
3 Consent from the Department of Orang Asli Development (JaKOA) [JHEOA,PP.30.042.Jld5(17)]  
4 and Institutional ethics approval was granted by Universiti Teknologi MARA (UiTM) [600-  
5 RMI(5/1/6)] were obtained prior the initiation of this study. All methods were carried out in  
6 accordance with relevant guidelines and regulations. Written, informed consent was obtained  
7 from all subjects aged 18 years-old and above, prior to recruitment. Communications were done  
8 in Bahasa Malaysia with some input from local translators, either JaKOA officers or tribal leaders  
9 if and when required.

## 10 11 12 **Funding**

- 13  
14 1) The Ministry of Higher Education Malaysia under Fundamental Research Grant Scheme  
15 [Grant code: 600-RMI/FRGS 5/3 (136/2014)]
- 16 2) The Ministry of Higher Education Malaysia under Long Term Research Grant Scheme  
17 [Grant code: 600-RMI/LRGS 5/3 (2/2011)-2]

18  
19 The funders had no role in study design, data collection and analysis, decision to publish, or  
20 preparation of the manuscript.

## 21 22 23 **Competing Financial Interests**

24  
25 The author(s) declare no competing financial interests.

## 26 27 28 **Data Sharing**

29  
30 No additional data available.

## INTRODUCTION

*Orang Asli* (OA) are the indigenous people and the oldest inhabitants of Peninsular Malaysia. There are 18 OA tribes, categorized under three main groups according to their different languages and customs: Negrito, located the Northern part of the peninsula; Senoi, residing in the Central Region and Proto-Malays (or Aboriginal Malay), in the Southern Region. The OA constitutes 0.5% (150,000) of the total Malaysian population with Senoi representing the largest OA population (54%) followed by the Proto Malays (43%), and the Negrito (3%) [1].

Negrito, known to be the earliest OA tribe to arrive in Peninsular Malaysia, is believed to enter this region of Malaysia about 25,000 years ago [2]. A Majority of the Negritos continue to practice nomadic lifestyle for reasons such as illness, food resources and intra-tribal feuds.

The poverty rate among OA is 76.9% with the majority of OA living in the jungles or rural areas, while a minority have moved into urban areas [3]. Although, the Malaysian Government have taken measures to eradicate the poverty level among the OAs which subsequently led to the reduction of poverty-associated diseases such as malaria, tuberculosis, AIDS and dental decay [3], to name a few; disorders such as metabolic syndrome (MS) and coronary artery disease (CAD) are not well addressed. This could most likely stem from the common misnomer that these are diseases of the rich, when in fact, it is not exclusive to one type of socioeconomic group but transcends all walks of life [4,5].

MS, a major public health challenge, is a cluster of metabolic disturbances which result from a complex interaction between genetic and environmental factors [6]. MS is associated with increased risk of CAD [7]. The metabolic abnormalities that underlie the definition of MS include insulin resistance, central obesity, dyslipidaemia, hypertension and glucose intolerance [8]. The prevalence of MS among Malaysians was estimated from 37.1%-42.5% in 2008 [9].

It has also been well established that MS is associated with enhanced inflammation, endothelial activation and prothrombogenesis which are key processes in atherosclerosis. Previous studies have documented the association between MS and enhanced inflammation [10]. Increases in proinflammatory cytokines such as interleukin-6 (IL-6), resistin and C-reactive protein (CRP) are due to the overproduction by monocyte-derived macrophages residing in the expanded adipose tissue mass [11]. NCEP-ATP reported higher soluble endothelial adhesion molecules such as intercellular adhesion molecule-1 (ICAM-1), vascular adhesion molecule-1 and E-selectin among subjects with MS [12]. Furthermore, various studies have also shown elevated lipoprotein (a) [Lp(a)] in MS subjects [13]. Lp(a) has been found to manifest significantly reduced endogenous clot lysis in plasma ex vivo [14], possibly to its binding to fibrinogen and attenuating fibrin-mediated enhancement of tissue plasminogen activator of plasminogen [15].

Despite MS becoming a major public health concern with extensive data on this syndrome worldwide, reports on its prevalence in Malaysia remain scarce, particularly so among the OA in the country. There have been previous studies addressing factors

related to MS globally in Malaysia [16], however, the samples used in these studies were not a representative of the Malaysian population as they focused on the major ethnicities in Malaysia – Malay, Chinese and Indian, while the OA population was poorly represented.

To the best of our knowledge, there is only one recent published study that reported the urbanized Orang Seletar (a Proto-Malay subtribe) having the highest prevalence for central obesity ( $66.1\pm 5.9\%$ ) compared to the other subtribes who are less urbanized (Senoi and Negrito). The study also revealed that the prevalence for hypertension was highest among the Negritos ( $43.8\pm 9.3\%$  and  $51.2\pm 15.3\%$ ) who resided in most remote areas and were the leanest among the six OA subtribes investigated [1].

The lack of data on the prevalence of MS among OA specifically the Negritos, could most likely stem from the preconceived notion that they are not susceptible to the disorder due to their detachment from urbanization and their healthier lifestyle. Furthermore, there have been very few studies investigating the status of the biomarkers reflecting inflammation, endothelial activation and prothrombogenesis among the Negritos with MS. In addition, determining the MS components among them will further identify potential modifiable coronary risks such as hypertension, smoking, dyslipidaemia and glucose intolerance through proper education and healthcare services.

Therefore, this study aims to: 1) determine the MS components commonly seen among the Negrito, 2) elucidate the status of inflammation, endothelial activation and prothrombogenesis in Negrito and 3) identify the independent predictors for these biomarkers of coronary risk.

## SUBJECTS AND METHODS

### Target population and sample collection

150 Negrito subjects were recruited in this cross-sectional study. They were from Bateq and Mendriq sub-tribe, from three inland settlements in Gua Musang, Kelantan, East Coast Malaysia ( $4.8843^{\circ}\text{N}$ ,  $101.9682^{\circ}\text{E}$ ). 1,192 Malays were also recruited from various national health screening programmes in Malaysia.

The sample size was calculated using PS Power and Sample Size Calculations version 3.0 with a power of study at 99% and prevalence of MS in Negritos and Malays at  $15.2\%\pm 5\%$  [17] and  $38.8\%\pm 5\%$  [18] respectively, the minimum sample size for Negrito and Malay are both 125. Due to the significant sample size difference between the two ethnic groups and the relative difficulty in accessing the Negrito's remote locations of habitat, it is relevant to mention that this study conducted a within-ethnic group rather than a between-group comparison of the biomarkers of interest.

### History-taking and Topography Measurements

Demographic data was gathered by interview questionnaire. Information such as age, gender, tribe, education and occupation, health-related questions included subjects' past

1  
2  
3 medical, social that included smoking status and infectious diseases status were  
4 recorded. Family history of cardiometabolic and infectious diseases were also recorded.  
5

6 Topography measurements included blood pressure (BP), body mass index (BMI), waist  
7 circumference (WC) and waist-to-hip ratio (WHR). With the subject in a seated position  
8 and after 5-10 minute rest, BP was measured by an automated BP reader (cuff size 12 x  
9 33cm, Colin press-mate, Japan). The systolic BP (SBP) and diastolic BP (DBP) were  
10 measured to the nearest 1mmHg. BMI was calculated using the formula:  
11  $BMI = \text{weight}(\text{kg}) / \text{height}^2(\text{m}^2)$ . WC was measured to the nearest 0.5cm using a measuring  
12 tape at midway between the inferior margin of the last rib and the iliac crest in a  
13 horizontal plane. Hip circumference measurement was taken around the pelvis at the  
14 point of maximal protrusion of the buttocks. Any visible stigmata of dyslipidaemia and  
15 diabetes mellitus were documented.  
16  
17

## 18 **Defining MS**

19  
20  
21 An individual was classified as having MS if central obesity was exhibited along with at  
22 least two of the following: (1) elevated triglyceride (TG) concentration of  $>1.7\text{mmol/L}$ , (2)  
23 reduced high-density lipoprotein cholesterol (HDL-c) of  $<1.0$  or  $1.3\text{mmol/L}$  in male and  
24 female respectively, (3) elevated BP of  $>140/90\text{mmHg}$ , and a raised fasting plasma  
25 glucose (FPG) of  $\geq 5.6\text{mmol/L}$ . Central obesity, using the suggested WC for Asian/South  
26 Asians, was defined as  $\geq 90\text{cm}$  and  $\geq 80\text{cm}$  for males and females respectively [19].  
27  
28

## 29 **Venous blood sampling and on-site biochemical analysis**

30  
31 Venous blood samples were collected following non-traumatic venepuncture between  
32 0800 and 1500h. Serum and plasma were separated by centrifugation at 3500rpm for 10  
33 minutes within 1 hour and stored at  $-20^{\circ}\text{C}$  before analyse.  
34  
35

## 36 **Biochemical Analysis**

37  
38  
39 Serum samples were sent to Centre for Pathology Diagnostic & Research Laboratories  
40 (CPDRL) of Faculty of Medicine, Universiti Teknologi MARA. All clinical chemistry tests  
41 were MS ISO 15189:2014 accredited.  
42

43  
44 Cardiometabolic parameters tested were fasting serum lipids (FSL) which included total  
45 cholesterol (TC), TG and HDL-c which were measured by enzymatic reference methods.  
46 Plasma glucose was analysed by hexokinase method. All methods were run on an  
47 automated analyser (Cobas Integra 400 PLUS, Roche Diagnostic, Germany) except for  
48 LDL-c concentration was derived by calculation using the Friedewald equation [20].  
49

## 50 **Analyses of Biomarkers of inflammation, endothelial activation and** 51 **prothrombogenesis**

52  
53  
54  
55 The biomarkers analysed included high sensitivity of CRP (hsCRP), sICAM-1 and Lp(a).  
56 Both hsCRP and Lp(a) were measured using turbidimetric method on an automated  
57  
58



1  
2  
3 analyser (Cobas Integra 400 PLUS, Roche Diagnostics, Germany). Serum s-ICAM-1  
4 concentration was determined by enzyme linked immunosorbent assay (ELISA) based  
5 on the measured optical density (eBioscience Bender MedSystems, Vienna Austria).  
6  
7

## 8 **Data Analysis**

9

10 The associations of all three biomarkers were compared between two groups of MS and  
11 non-MS, using independent T-test, SPSS version 20. A multiple binary regression  
12 analysis was used to analyse the independent predictor of biomarkers and components  
13 of MS which include age, gender, race, smoking status, glucose and HDL-c  
14 concentrations.  
15  
16

## 17 **RESULTS**

18

### 19 **Demographic Data**

20  
21

22 Table 1 summarizes the demographic parameters for the Malays and Negritos. A total of  
23 1,342 subjects were recruited in this study comprising of 1,192 Malays and 150 Negritos.  
24 Of these, 326 Malays (27.3%) and 17 Negritos (11.3%) were diagnosed with MS based  
25 on the IDF 2006 criteria. On a separate note, 15.5% Malays were diabetic while 1.3% of  
26 the Negritos had IFG  $\geq 5.6$ mmol/L or random plasma glucose of  $>11.0$ mmol/L. 44.1% of  
27 the Malays and 59.3% of the Negritos were hypertensive while 59.2% Malays and 18.4%  
28 Negritos had central obesity.  
29  
30

31 Among the Negritos, their MS counterpart had higher TC ( $5.28 \pm 1.22$  vs  
32  $4.49 \pm 0.75$ mmol/L,  $p=0.02$  respectively), TG ( $2.54 \pm 1.20$  vs  $1.50 \pm 0.79$ mmol/L,  $p<0.01$   
33 respectively), LDL-c ( $3.18 \pm 0.64$  vs  $2.78 \pm 0.62$ mmol/L,  $p=0.02$  respectively) and lower  
34 HDL-c ( $0.84 \pm 0.21$  vs  $1.02 \pm 0.27$ mmol/L,  $p=0.01$  respectively). The most frequent criteria  
35 diagnosing MS among the Negritos were hypertension, elevated TG and low HDL-c and  
36 none of the Negritos diagnosed with MS had any form of glucose intolerance.  
37  
38  
39  
40  
41  
42  
43  
44  
45  
46  
47  
48  
49  
50  
51  
52  
53  
54  
55  
56  
57  
58  
59  
60

**Table 1: Demographic and clinical characteristics of the Negritos and Malays**

| Parameters                                 | Malays<br>(n = 1192) |                   |         | Negrito<br>(n = 150) |                   |         | All Subjects<br>(n = 1342) |                   |         |
|--------------------------------------------|----------------------|-------------------|---------|----------------------|-------------------|---------|----------------------------|-------------------|---------|
|                                            | MS<br>(n=326)        | Non-MS<br>(n=851) | p value | MS<br>(n=17)         | Non-MS<br>(n=124) | p value | MS<br>(n=343)              | Non-MS<br>(n=975) | p value |
| <sup>b</sup> Age (Years)                   | 49.53±11.77          | 40.00±14.69       | <0.001  | 33.06±12.19          | 33.52±13.45       | NS      | 48.76±12.28                | 39.26±14.69       | <0.001  |
| <sup>a</sup> Gender<br>(Males/Females)     | 45.1/54.9            | 37.3/62.7         | 0.02    | 17.6/82.4            | 60.2/39.8         | <0.01   | 43.7/56.3                  | 40.1/59.9         | NS      |
| <sup>a</sup> Diabetes                      | 42.1                 | 5.6               | <0.001  | 0.00                 | 1.4               | NS      | 40.9                       | 5.2               | <0.001  |
| <sup>b</sup> Plasma glucose<br>(mmol/L)    | 8.22±4.38            | 5.88±2.33         | <0.001  | 5.21±1.33            | 4.66±1.40         | NS      | 8.14±4.35                  | 5.79±2.30         | <0.001  |
| <sup>a</sup> Hypertension                  | 83.2                 | 28.9              | <0.001  | 88.2                 | 55.6              | 0.02    | 83.4                       | 32.3              | <0.001  |
| <sup>b</sup> SBP (mmHg)                    | 138.22±17.82         | 120.99±17.86      | <0.001  | 138.26±23.51         | 130.79±17.26      | NS      | 138.22±18.11               | 122.25±18.07      | <0.001  |
| <sup>b</sup> DBP (mmHg)                    | 83.49±10.63          | 73.69±11.42       | <0.001  | 82.54±11.12          | 81.50±13.12       | NS      | 83.44±10.65                | 74.69±11.93       | <0.001  |
| <sup>a</sup> Central Obesity               | 100                  | 42.9              | <0.001  | 100                  | 3.2               | <0.001  | 100                        | 37.8              | <0.001  |
| <sup>b</sup> Waist<br>circumference (cm)   | 97.19±8.93           | 82.75±11.24       | <0.001  | 92.21±8.36           | 71.60±9.68        | <0.001  | 96.94±8.96                 | 81.33±11.66       | <0.001  |
| <sup>b</sup> BMI (kg/m <sup>2</sup> )      | 30.57±4.90           | 24.94±4.77        | <0.001  | 26.68±3.06           | 19.83±2.50        | <0.001  | 30.38±4.90                 | 24.30±4.85        | <0.001  |
| <sup>a</sup> Current smoker                | 16.9                 | 13.2              | NS      | 23.5                 | 46.8              | NS      | 17.2                       | 17.4              | NS      |
| <sup>b</sup> Total cholesterol<br>(mmol/L) | 5.38±1.00            | 5.05±0.96         | <0.001  | 5.28±1.22            | 4.49±0.75         | 0.18    | 5.38±1.02                  | 4.98±0.95         | <0.001  |
| <sup>b</sup> Triglyceride<br>(mmol/L)      | 2.70±1.54            | 1.41±0.82         | <0.001  | 2.54±1.20            | 1.50±0.79         | <0.01   | 2.69±1.53                  | 1.42±0.82         | <0.001  |
| <sup>b</sup> LDL-c (mmol/L)                | 3.10±0.76            | 2.99±0.76         | 0.03    | 3.18±0.64            | 2.78±0.62         | 0.02    | 3.10±0.75                  | 2.97±0.75         | <0.01   |
| <sup>b</sup> HDL-c (mmol/L)                | 1.08±0.31            | 1.42±0.37         | <0.001  | 0.84±0.21            | 1.02±0.27         | 0.01    | 1.07±0.31                  | 1.37±0.38         | <0.001  |

**Notes:** <sup>a</sup> Data expressed as percentage; <sup>b</sup> Data expressed as Mean±SD

**Abbreviations:** SBP, systolic blood pressure; DBP, diastolic blood pressure; BMI, Body mass index; NS, not significant

**Comparison of the biomarkers of inflammation, endothelial activation and prothrombogenesis in Malay and Negrito subjects (Table 2)**

When compared with all subjects, there was significantly higher concentration of hsCRP (mean±SD=1.89±1.17 vs 1.43±1.14mg/L, p<0.001) and sICAM-1 (mean±SD=530.72±183.88 vs 469.17±204.79ng/mL, p<0.01) among MS compared to non-MS respectively, but differences were not observed in serum Lp(a) concentration between these groups (p>0.05).

There was no significant differences between MS and non-MS among Negritos for all biomarkers (p>0.05) whereas MS Malays illustrated higher hsCRP (mean±SD=1.88±1.16 vs 1.26±1.13mg/L, p<0.001 respectively) and sICAM-1 (mean±SD=531.73±185.73 vs 465.46±202.08ng/mL, p<0.001 respectively) concentrations compared to their non-MS counterpart.

**Table 2: Concentrations of inflammatory, endothelial activation and prothrombogenesis biomarkers in MS and non-MS Malays and Negritos**

| Biomarkers      | Malays (n = 1,192) |                |         | Negrito (n = 150) |                |         | All Subjects (n = 1342) |                |         |
|-----------------|--------------------|----------------|---------|-------------------|----------------|---------|-------------------------|----------------|---------|
|                 | MS (n=326)         | Non-MS (n=851) | p value | MS (n=17)         | Non-MS (n=124) | p value | MS (n=343)              | Non-MS (n=975) | p value |
| hsCRP (mg/L)    | 1.88±1.16          | 1.26±1.13      | <0.001  | 2.19±1.33         | 1.47±1.28      | NS      | 1.89±1.17               | 1.27±1.13      | <0.001  |
| sICAM-1 (ng/mL) | 531.73±185.76      | 465.46±202.08  | <0.001  | 587.59±322.86     | 606.38±354.08  | NS      | 530.72±183.88           | 469.17±204.79  | <0.01   |
| Lp(a) (g/L)     | 0.06±0.04          | 0.06±0.04      | NS      | 0.28±0.31         | 0.24±0.23      | NS      | 0.06±0.04               | 0.06±0.04      | NS      |

**Notes:** Data expressed as Mean ± SD

**Abbreviations:** NS, not significant

### Independent predictors of the biomarkers of inflammation, endothelial activation and prothrombogenesis in Malay and Negrito subjects (Table 3)

To further determine the independent predictors of these biomarkers, binary logistic regression analyses were performed with the biomarkers as dependent variables. It was found that BMI ( $p=0.016$ ), FPG ( $p<0.001$ ) and DBP ( $p=0.042$ ) were independent predictors for hsCRP whilst Negrito race determined Lp(a) ( $p<0.001$ ) when taken account all subjects after adjusted for age, gender, DM, hypertension, smoking status and BMI.

Among the Malays, it was found that male gender ( $p<0.001$ ), BMI ( $p<0.001$ ) and FPG concentration ( $p<0.001$ ) predicted for hsCRP whilst male gender ( $p=0.040$ ) and FPG ( $p=0.039$ ) predicted Lp(a) after adjusting for the same parameters. There were no independent predictors for any of these biomarkers among Negritos.

**Table 3: Predictors for hsCRP and Lp(a)**

| Groups           | Variables | Independent predictor      | Constant | Beta  | SE   | Adjusted OR | 95% CI Lower, Upper | p value |
|------------------|-----------|----------------------------|----------|-------|------|-------------|---------------------|---------|
| (a) All Subjects | hsCRP     | 1) BMI ( $\text{kg/m}^2$ ) | -5.81    | 0.05  | 0.02 | 1.05        | 1.01, 1.10          | 0.016   |
|                  |           | 2) Glucose (mmol/L)        |          | 0.15  | 0.02 | 1.16        | 1.12, 1.19          | <0.001  |
|                  |           | 3) Diastolic (mmHg)        |          | 0.01  | 0.01 | 1.01        | 1.00, 1.02          | 0.042   |
|                  | Lp(a)     | 1) Race (Negrito)          | -1.57    | 1.03  | 0.20 | 2.79        | 1.87, 4.14          | <0.001  |
| (b) Malays       | hsCRP     | 1) Gender (male)           | -5.76    | -0.64 | 0.15 | 0.53        | 0.39, 0.71          | <0.001  |
|                  |           | 2) BMI ( $\text{kg/m}^2$ ) |          | 0.18  | 0.02 | 1.20        | 1.16, 1.24          | <0.001  |
|                  |           | 3) Glucose (mmol/L)        |          | 0.08  | 0.02 | 1.08        | 1.04, 1.13          | <0.001  |
|                  | Lp(a)     | 1) Gender (Male)           | -0.87    | -0.56 | 0.20 | 0.57        | 0.39, 0.84          | 0.004   |
|                  |           | 2) Glucose (mmol/L)        |          | -0.08 | 0.04 | 0.93        | 0.86, 1.00          | 0.039   |

**Notes:** The model reasonably fits well. Model assumptions are met. There are no interaction and multicollinearity problem.

## DISCUSSION

MS is defined by an aggregation of atherosclerotic factors, mainly visceral obesity, systemic hypertension, glucose intolerance and dyslipidaemia which, in combination, enhance the probability of developing type 2 DM and CAD [21]. In a European studies [22,23], the presence of MS predicted increased CAD mortality. These findings are not unexpected considering MS comprises of established risk factors for CAD such as hypertension, impaired glucose tolerance, low HDL-c concentration, elevated TG concentration and obesity, which enhances endothelial activation and inflammation, key processes in atherogenesis.

There have been several previous reports determining the prevalence of non-communicable diseases (NCD) such as DM, hypertension, dyslipidaemia and obesity among OA subjects. A previous report on the health status of Lanoh ethnic sub-groups of OA showed that 8.9% were recently diagnosed with hypertension, 6.7% had hypertension and DM and an alarming 26.7% had pre-obesity [24]. A larger population study done identified central obesity and hypertension among OA sampled from 7 different subtribes and 8 settlements [1]. What is more alarming is the report by Aziz et al (2016) which highlighted the higher percentage of OA having high insulin levels, hsCRP and higher percentage categorized as high risk by the Framingham Risk Score which forecasts 10-year risk of CAD [25]. These reports strongly imply that NCDs such as hypertension, dyslipidaemia, central obesity and DM – which are clusters of metabolic factors associated with MS, have gradually led to the increase in CAD risk among OA.

Although several reports highlighted the increasing prevalence of NCDs among OA in Malaysia, there is scarce research that extended to investigate biomarkers for coronary risk amongst this population. To the best of our knowledge, there is only one other study reported status of inflammatory biomarker among OA in Peninsular Malaysia compared to Malays [25]. Our study further explored other biomarkers reflecting atherogenesis such as endothelial activation and prothrombogenesis. This study showed that biomarkers of inflammation (hsCRP) and endothelial activation (sICAM-1) were enhanced in MS Malays compared to their non-MS counterpart. These findings are expected and in keeping with previous studies denoting the higher CAD risk among MS [19,25]. The association of MS with inflammation and endothelial activation is also well documented [12,26]. The elevated sICAM-1 seen among MS Malays could be attributed to higher prevalence of hypertension, obesity and dyslipidaemia compared to their non-MS counterpart which is parallel with previous reports [26,27].

However and interestingly, there was no difference in the concentrations of biomarkers of inflammation, endothelial activation and prothrombogenesis between MS and non-MS among the Negritos which contradicted previous report underscoring enhanced inflammation among OAs [25]. These inconsistent findings could be explained by population differences where our study targeted mainly inland Negritos in the northern state of Malaysia where majority of them are distributed, while those recruited OAs from a mixture of inland and peripheries of towns where urbanization could have influenced lifestyle which could enhance inflammation and insulin resistance [25]. In addition, as a general index of inflammation, CRP concentrations have been shown to vary by ethnicity and within ethnic groups by fitness, as there were higher in healthy Indian Asians than in

1  
2  
3 European white people and were related to greater central obesity and insulin resistance  
4 in Indian Asians [28].  
5

6 Furthermore, findings from this study suggest that despite having metabolic risks for  
7 CAD among the MS Negritos group, the failure to exhibit enhanced atherogenesis could  
8 possibly be attributed to genetic and/or lifestyle influences which may play a role in  
9 attenuating atherogenesis. The Negritos included in this study were located in remote  
10 areas of Northern Peninsular Malaysia and to certain extent, still practicing the hunter  
11 gatherers lifestyle, and living isolated from urbanization which may have contributed to  
12 the differences observed in the biomarkers between the two races when comparing with  
13 the MS and non-MS counterparts. This is in keeping with previous studies which  
14 reported improved inflammatory, endothelial activation and prothrombogenesis status in  
15 MS subjects, following aggressive lifestyle modification which included dietary  
16 improvement and initiation and maintenance of exercise [29,30].  
17  
18

19 There have been previous reports identifying the gene variants of *CDH13* which have  
20 been shown to influence metabolic outcome and possibly provides atherogenesis  
21 resistant [31–33]. The *CDH13* gene encodes for T-cadherin which belongs to the  
22 cadherin superfamily of the transmembrane proteins that mediate calcium-dependent  
23 intercellular adhesion, is the receptor for the high molecular weight adiponectin  
24 expressed in the vasculature [34] and cardiac myocytes [35]. Adiponectin plays a crucial  
25 role in the metabolic regulation of obesity, insulin sensitivity and atherosclerosis and  
26 several studies have indicated its anti-atherogenic properties [36]. A recent study  
27 reported that minor allele of rs12051272 revealed a considerable association with a  
28 more favourable metabolic profile, including higher insulin sensitivity, HDL-c, lower DBP,  
29 FPG and TG concentrations [32]. One study highlighted the presence of a strong signal  
30 of *CDH13* in Negritos which also showed a profoundly different genetic variation of this  
31 gene compared to the other OA subtribes [37]. Given the phenotypic observations and  
32 the role of this gene, we postulate a plausibility of *CDH13* regulating the phenotype and  
33 could explain the findings observed in our study whereby despite fulfilling criteria for MS,  
34 these Negritos subjects did not exhibit augmented inflammatory or endothelial activation  
35 status when compared to their non-MS counterpart. Future studies exploring  
36 expressions of genetic variants of *CDH13* in these Negritos cohorts could further shed  
37 light on influences of this gene on atherogenesis.  
38  
39

40 Regression analysis have shown that Negrito race independently predicts Lp(a) in this  
41 study. This finding imply that despite having a healthier lifestyle by being hunter  
42 gatherers and relatively isolated from modernization, suggests that serum Lp(a)  
43 concentrations are not influenced by diet or lifestyle, but more significantly by variants in  
44 the *LPA* gene. This is in parallel with previous studies that have shown significant  
45 difference in Lp(a) levels among various races including Asian Indian, Chinese, Non-  
46 Hispanic and blacks [38,39]. Studies have demonstrated the presence of *LPA* gene  
47 polymorphisms primarily determining levels of Lp(a), without significant dietary or  
48 environmental effects [40]. Further studies are warranted to identify common  
49 polymorphisms in *LPA* gene among Negritos and other OA tribes which would further  
50 validate these inferences.  
51  
52  
53  
54  
55  
56  
57  
58  
59  
60

## CONCLUSION

This study highlights several key findings which provide further insights into the metabolic differences between the inland-living aboriginal group, Negritos, in Malaysia and urbanized Malays in Malaysia. Firstly, MS Negritos do not appear to share similar coronary risks as those of MS Malays and MS in general as depicted by several studies which have established that MS is associated with enhanced inflammation, endothelial activation and prothrombogenesis. This warrants further study to understand the mechanism behind this discrepancy which could be due, in part, to genetics, lifestyle or a combination of both. Secondly, Negritos independently predicting serum Lp(a) concentrations suggests a genetic influence that surpasses any form of impact by diet and lifestyle which needs further exploration. Therefore, future studies to identify common variants of *LPA* gene among this group and to extend such research to other Aborigine tribes would further improve our understanding of interaction between gene and phenotypic expression of Lp(a).

## ACKNOWLEDGMENTS

The authors would like to express their appreciation to the Centre for Pathology Diagnostic and Research Laboratories (CPDRL) of Faculty of Medicine, Universiti Teknologi MARA for providing the facilities to conduct this research.

## CONTRIBUTORSHIP STATEMENT

A.M collected the subjects, performed the experiments, analyzed the samples and data, prepared the tables, wrote the manuscript and reviewed drafts of the paper.

S.S.M collected the subjects, analyzed the samples and reviewed drafts of the paper.

A.M.I collected the subjects, validated results and reviewed drafts of the paper.

F.M.N, S.A.S and K.Y collected the subjects and reviewed drafts of the paper.

H.N collected the subjects, contributed reagents and materials and reviewed drafts of the paper.

T.R conceived and designed the experiments, collected the subjects, contributed reagents and materials, wrote the manuscript and reviewed drafts of the paper.

B.P.H conceived and designed the experiments, collected the subjects, validated results, contributed reagents and materials and reviewed drafts of the paper.

## REFERENCES

- 1 Phipps ME, Chan KKL, Naidu R, *et al.* Cardio-metabolic health risks in indigenous populations of Southeast Asia and the influence of urbanization. *BMC Public Health* 2015;**15**:1–8. doi:10.1186/s12889-015-1384-3
- 2 Masron T, Masami F, Ismail N. Orang Asli in Peninsular Malaysia: Population, Spatial Distribution and Socio-Economic Condition. *J Ritsumeikan Soc Sci Humanit* 2013;**6**:75–115.

- 1  
2  
3 Lim YAL, Romano N, Colin N, *et al.* Intestinal parasitic infections amongst orang  
4 asli (indigenous) in malaysia: Has socioeconomic development alleviated the  
5 problem? *Trop Biomed* 2009;**26**:110–22.
- 6 Weng X, Liu Y, Ma J, *et al.* An urban–rural comparison of the prevalence of the  
7 metabolic syndrome in Eastern China. *Public Health Nutr* 2007;**10**:131–6.  
8 doi:10.1017/S1368980007226023
- 9 Prabhakaran D, Chaturvedi V, Shah P, *et al.* Differences in the prevalence of  
10 metabolic syndrome in urban and rural India: a problem of urbanization. *Chronic*  
11 *Illn* 2007;**3**:8–19. doi:10.1177/1742395307079197
- 12 Ordovas JM. Genetic links between diabetes mellitus and coronary  
13 atherosclerosis. *Curr Atheroscler Rep* 2007;**9**:204–10.
- 14 Zambon A, Pauletto P, Crepaldi G. Review article: the metabolic syndrome - a  
15 chronic cardiovascular inflammatory condition. *Aliment Pharmacol Ther*  
16 2005;**22**:20–3. doi:10.1111/j.1365-2036.2005.02589.x
- 17 Eckel RH, Grundy SM, Zimmet PZ. The metabolic syndrome. *Lancet*  
18 2005;**365**:1415–28. doi:10.1016/S0140-6736(09)61794-3
- 19 Mohamud WNW, Ismail A al S, Khir ASM, *et al.* Prevalence of metabolic  
20 syndrome and its risk factors in adult Malaysians: Results of a nationwide survey.  
21 *Diabetes Res Clin Pract* 2012;**96**:91–7. doi:10.1016/j.diabres.2011.11.020
- 22 Fuentes E, Fuentes F, Vilahur G, *et al.* Mechanisms of chronic state of  
23 inflammation as mediators that link obese adipose tissue and metabolic  
24 syndrome. *Mediators Inflamm* 2013;**2013**:136584. doi:10.1155/2013/136584
- 25 Weisberg SP, McCann D, Desai M, *et al.* Obesity is associated with macrophage  
26 accumulation in adipose tissue. *J Clin Invest* 2003;**112**:1796–808.  
27 doi:10.1172/JCI200319246
- 28 Mottillo S, Filion KB, Genest J, *et al.* The metabolic syndrome and cardiovascular  
29 risk: A systematic review and meta-analysis. *J Am Coll Cardiol* 2010;**56**:1113–32.  
30 doi:10.1016/j.jacc.2010.05.034
- 31 Bermúdez V, Rojas J, Salazar J, *et al.* Variations of Lipoprotein ( a ) Levels in the  
32 Metabolic Syndrome: A Report from the Maracaibo City Metabolic Syndrome  
33 Prevalence Study. 2013;**2013**.
- 34 Loscalzo J. Review Lipoprotein(a): A unique risk factor for atherothrombotic  
35 disease. *Arterioscler Thromb Vasc Biol* 1993;**10**:672–9.  
36 doi:\url{10.1161/01.ATV.10.5.672}
- 37 Loscalzo J, Weinfeld M, Fless GM, *et al.* Lipoprotein(a), fibrin binding, and  
38 plasminogen activation. *Arterioscler Thromb Vasc Biol* 1990;**10**:240–  
39 5.<http://atvb.ahajournals.org/content/10/2/240?download=true> (accessed 8 Apr  
40 2017).
- 41 Ghee LK, Kooi CW. A review of metabolic syndrome research in Malaysia. *Med J*  
42 *Malaysia* 2016;**71**:20–8.
- 43 Ashari LS, Mitra AK, Rahman TA, *et al.* Prevalence and risk factors of metabolic  
44 syndrome among an endangered tribal population in Malaysia using harmonized  
45 IDF criteria. *Int J Diabetes Dev Ctries* 2016;**36**:352–8. doi:10.1007/s13410-016-  
46 0487-4
- 47 Mohamud WNW, Ismail A al-S, Khir ASM, *et al.* Prevalence of metabolic  
48 syndrome and its risk factors in adult Malaysians: results of a nationwide survey.  
49 *Diabetes Res Clin Pract* 2011;**91**:91–7. doi:10.1016/j.diabres.2011.11.020
- 50 Alberti SG, Zimmet P, Shaw J, *et al.* The IDF Consensus Worldwide Definition of  
51 the  
52 Metabolic  
53 Syndrom. 2006.  
54 [https://www.idf.org/webdata/docs/IDF\\_Meta\\_def\\_final.pdf](https://www.idf.org/webdata/docs/IDF_Meta_def_final.pdf)
- 55 Friedewald WT, Levy RI, Fredrickson DS. Estimation of the concentration of low-



- density lipoprotein cholesterol in plasma, without use of the preparative ultracentrifuge. *Clin Chem* 1972;**18**:499–502. doi:10.1177/107424840501000106
- 21 Alberti KGMM, Eckel RH, Grundy SM, *et al.* Harmonizing the metabolic syndrome: A joint interim statement of the international diabetes federation task force on epidemiology and prevention; National heart, lung, and blood institute; American heart association; World heart federation; International . *Circulation* 2009;**120**:1640–5. doi:10.1161/CIRCULATIONAHA.109.192644
- 22 Isomaa B, Almgren P, Tuomi T, *et al.* Cardiovascular morbidity and mortality associated with the metabolic syndrome. *Diabetes Care* 2001;**24**:683–9. doi:10.2337/diacare.24.4.683
- 23 Lakka H, Laaksonen DE, Lakka TA. The Metabolic Syndrome and Total and Cardiovascular Disease Mortality in Middle-aged Men. 2010;**288**:2709–16. doi:10.1001/jama.288.21.2709
- 24 Cheng YX, Chong CP, Kiew CF, *et al.* An assessment of health and social-economic status among Lanoh ethnic sub-group of Orang Asli (indigenous peoples) in Air Bah I village, state of Perak, Malaysia. *J Appl Pharm Sci* 2014;**4**:32–7. doi:10.7324/JAPS.2014.40106
- 25 Tuan Abdul Aziz TA, Teh LK, Md Idris MH, *et al.* Increased risks of cardiovascular diseases and insulin resistance among the Orang Asli in Peninsular Malaysia. *BMC Public Health* 2016;**16**:284. doi:10.1186/s12889-016-2848-9
- 26 Weiss TW, Arnesen H, Seljeflot I. Components of the Interleukin-6 transsignalling system are associated with the metabolic syndrome, endothelial dysfunction and arterial stiffness. *Metabolism* 2013;**62**:1008–13. doi:10.1016/j.metabol.2013.01.019
- 27 Brake DK, Smith EO, Mersmann H, *et al.* ICAM-1 expression in adipose tissue: effects of diet-induced obesity in mice 3. *Am J Physiol Cell Physiol* 2006;**291**:C1232–9. doi:10.1152/ajpcell.00008.2006.
- 28 Tang L, Peng H, Xu T, *et al.* Association of Biomarkers of Inflammation with Dyslipidemia and Its Components among Mongolians in China. *PLoS One* 2014;**9**:e89023. doi:10.1371/journal.pone.0089023
- 29 Antonio F, Fonseca H, Cristina De Oliveira Izar M. High-Sensitivity C-Reactive Protein and Cardiovascular Disease Across Countries and Ethnicities. *Clinics* 2016;**71**:235–42. doi:10.6061/clinics/2016(04)11
- 30 Tuttolomondo A, Di Raimondo D, Pecoraro R, *et al.* Atherosclerosis as an inflammatory disease. *Curr Pharm Des* 2012;**18**:4266–88.
- 31 Liu X, Yunus Y, Lu D, *et al.* Differential positive selection of malaria resistance genes in three indigenous populations of Peninsular Malaysia. *Hum Genet* 2015;**134**:375–92. doi:10.1007/s00439-014-1525-2
- 32 Teng MS, Hsu LA, Wu S, *et al.* Association of CDH13 genotypes/haplotypes with circulating adiponectin levels, metabolic syndrome, and related metabolic phenotypes: The role of the suppression effect. *PLoS One* 2015;**10**:1–13. doi:10.1371/journal.pone.0122664
- 33 Gao H, Kim YM, Chen P, *et al.* Genetic variation in *cdh13* is associated with lower plasma adiponectin levels but greater adiponectin sensitivity in east asian populations. *Diabetes* 2013;**62**:4277–83. doi:10.2337/db13-0129
- 34 W. Hebbard L, Garlatti M, J.T. Young L, *et al.* T-cadherin Supports Angiogenesis and Adiponectin Association with the Vasculature in a Mouse Mammary Tumor Model. *Cancer Res* 2008;**65**:1407–16.
- 35 Denzel MS, Scimia M, Zumstein PM, *et al.* T-cadherin is critical for adiponectin-mediated cardioprotection in mice. *J Clin Invest* 2010;**120**:4342–52. doi:10.1172/JCI43464DS1

- 1  
2  
3 36 Matsuzawa Y, Funahashi T, Kihara S, *et al.* Adiponectin and Metabolic Syndrome.  
4 *Arterioscler Thromb Vasc Biol* 2004;**24**:29–33.  
5 doi:10.1161/01.ATV.0000099786.99623.EF  
6  
7 37 Deng L, Hoh BP, Lu D, *et al.* The population genomic landscape of human genetic  
8 structure, admixture history and local adaptation in Peninsular Malaysia. *Hum*  
9 *Genet* 2014;**133**:1169–85. doi:10.1007/s00439-014-1459-8  
10  
11 38 Banerjee D, Wong EC, Shin J, *et al.* Racial and Ethnic Variation in Lipoprotein (a)  
12 Levels among Asian Indian and Chinese Patients. *J Lipids* 2011;**2011**:291954.  
13 doi:10.1155/2011/291954  
14  
15 39 Guyton JR, Dahlen GH, Patsch W, *et al.* Relationship of plasma lipoprotein Lp(a)  
16 levels to race and to apolipoprotein B. *Arteriosclerosis* 1985;**5**:265–  
17 72.<http://www.ncbi.nlm.nih.gov/pubmed/3158297>  
18  
19 40 Tsimikas S, Hall JL. Lipoprotein(a) as a potential causal genetic risk factor of  
20 cardiovascular disease: A rationale for increased efforts to understand its  
21 pathophysiology and develop targeted therapies. *J Am Coll Cardiol* 2012;**60**:716–  
22 21. doi:10.1016/j.jacc.2012.04.038  
23  
24  
25  
26  
27  
28  
29  
30  
31  
32  
33  
34  
35  
36  
37  
38  
39  
40  
41  
42  
43  
44  
45  
46  
47  
48  
49  
50  
51  
52  
53  
54  
55  
56  
57  
58  
59  
60

## STROBE Statement—checklist of items that should be included in reports of observational studies

|                              | Item No | Recommendation                                                                                                                                                                                                                                                                                                                                                                                                                                                                                                                                                                                                                                                                                   | Check            |
|------------------------------|---------|--------------------------------------------------------------------------------------------------------------------------------------------------------------------------------------------------------------------------------------------------------------------------------------------------------------------------------------------------------------------------------------------------------------------------------------------------------------------------------------------------------------------------------------------------------------------------------------------------------------------------------------------------------------------------------------------------|------------------|
| <b>Title and abstract</b>    | 1       | (a) Indicate the study's design with a commonly used term in the title or the abstract<br>(b) Provide in the abstract an informative and balanced summary of what was done and what was found                                                                                                                                                                                                                                                                                                                                                                                                                                                                                                    | ✓                |
| <b>Introduction</b>          |         |                                                                                                                                                                                                                                                                                                                                                                                                                                                                                                                                                                                                                                                                                                  |                  |
| Background/rationale         | 2       | Explain the scientific background and rationale for the investigation being reported                                                                                                                                                                                                                                                                                                                                                                                                                                                                                                                                                                                                             | ✓                |
| Objectives                   | 3       | State specific objectives, including any prespecified hypotheses                                                                                                                                                                                                                                                                                                                                                                                                                                                                                                                                                                                                                                 | ✓                |
| <b>Methods</b>               |         |                                                                                                                                                                                                                                                                                                                                                                                                                                                                                                                                                                                                                                                                                                  |                  |
| Study design                 | 4       | Present key elements of study design early in the paper                                                                                                                                                                                                                                                                                                                                                                                                                                                                                                                                                                                                                                          | ✓                |
| Setting                      | 5       | Describe the setting, locations, and relevant dates, including periods of recruitment, exposure, follow-up, and data collection                                                                                                                                                                                                                                                                                                                                                                                                                                                                                                                                                                  | ✓                |
| Participants                 | 6       | (a) <i>Cohort study</i> —Give the eligibility criteria, and the sources and methods of selection of participants. Describe methods of follow-up<br><i>Case-control study</i> —Give the eligibility criteria, and the sources and methods of case ascertainment and control selection. Give the rationale for the choice of cases and controls<br><i>Cross-sectional study</i> —Give the eligibility criteria, and the sources and methods of selection of participants<br>(b) <i>Cohort study</i> —For matched studies, give matching criteria and number of exposed and unexposed<br><i>Case-control study</i> —For matched studies, give matching criteria and the number of controls per case | ✓                |
| Variables                    | 7       | Clearly define all outcomes, exposures, predictors, potential confounders, and effect modifiers. Give diagnostic criteria, if applicable                                                                                                                                                                                                                                                                                                                                                                                                                                                                                                                                                         | ✓                |
| Data sources/<br>measurement | 8*      | For each variable of interest, give sources of data and details of methods of assessment (measurement). Describe comparability of assessment methods if there is more than one group                                                                                                                                                                                                                                                                                                                                                                                                                                                                                                             | ✓                |
| Bias                         | 9       | Describe any efforts to address potential sources of bias                                                                                                                                                                                                                                                                                                                                                                                                                                                                                                                                                                                                                                        |                  |
| Study size                   | 10      | Explain how the study size was arrived at                                                                                                                                                                                                                                                                                                                                                                                                                                                                                                                                                                                                                                                        | ✓                |
| Quantitative variables       | 11      | Explain how quantitative variables were handled in the analyses. If applicable, describe which groupings were chosen and why                                                                                                                                                                                                                                                                                                                                                                                                                                                                                                                                                                     | ✓                |
| Statistical methods          | 12      | (a) Describe all statistical methods, including those used to control for confounding<br>(b) Describe any methods used to examine subgroups and interactions<br>(c) Explain how missing data were addressed<br>(d) <i>Cohort study</i> —If applicable, explain how loss to follow-up was addressed<br><i>Case-control study</i> —If applicable, explain how matching of cases and controls was addressed<br><i>Cross-sectional study</i> —If applicable, describe analytical methods taking account of sampling strategy<br>(e) Describe any sensitivity analyses                                                                                                                                | ✓<br>✓<br>✓<br>✓ |

Continued on next page

|                          |     |                                                                                                                                                                                                              |   |
|--------------------------|-----|--------------------------------------------------------------------------------------------------------------------------------------------------------------------------------------------------------------|---|
| <b>Results</b>           |     |                                                                                                                                                                                                              |   |
| Participants             | 13* | (a) Report numbers of individuals at each stage of study—eg numbers potentially eligible, examined for eligibility, confirmed eligible, included in the study, completing follow-up, and analysed            | ✓ |
|                          |     | (b) Give reasons for non-participation at each stage                                                                                                                                                         |   |
|                          |     | (c) Consider use of a flow diagram                                                                                                                                                                           |   |
| Descriptive data         | 14* | (a) Give characteristics of study participants (eg demographic, clinical, social) and information on exposures and potential confounders                                                                     | ✓ |
|                          |     | (b) Indicate number of participants with missing data for each variable of interest                                                                                                                          |   |
|                          |     | (c) <i>Cohort study</i> —Summarise follow-up time (eg, average and total amount)                                                                                                                             |   |
| Outcome data             | 15* | <i>Cohort study</i> —Report numbers of outcome events or summary measures over time                                                                                                                          |   |
|                          |     | <i>Case-control study</i> —Report numbers in each exposure category, or summary measures of exposure                                                                                                         |   |
|                          |     | <i>Cross-sectional study</i> —Report numbers of outcome events or summary measures                                                                                                                           | ✓ |
| Main results             | 16  | (a) Give unadjusted estimates and, if applicable, confounder-adjusted estimates and their precision (eg, 95% confidence interval). Make clear which confounders were adjusted for and why they were included | ✓ |
|                          |     | (b) Report category boundaries when continuous variables were categorized                                                                                                                                    | ✓ |
|                          |     | (c) If relevant, consider translating estimates of relative risk into absolute risk for a meaningful time period                                                                                             |   |
| Other analyses           | 17  | Report other analyses done—eg analyses of subgroups and interactions, and sensitivity analyses                                                                                                               |   |
| <b>Discussion</b>        |     |                                                                                                                                                                                                              |   |
| Key results              | 18  | Summarise key results with reference to study objectives                                                                                                                                                     | ✓ |
| Limitations              | 19  | Discuss limitations of the study, taking into account sources of potential bias or imprecision. Discuss both direction and magnitude of any potential bias                                                   | ✓ |
| Interpretation           | 20  | Give a cautious overall interpretation of results considering objectives, limitations, multiplicity of analyses, results from similar studies, and other relevant evidence                                   | ✓ |
| Generalisability         | 21  | Discuss the generalisability (external validity) of the study results                                                                                                                                        | ✓ |
| <b>Other information</b> |     |                                                                                                                                                                                                              |   |
| Funding                  | 22  | Give the source of funding and the role of the funders for the present study and, if applicable, for the original study on which the present article is based                                                | ✓ |

\*Give information separately for cases and controls in case-control studies and, if applicable, for exposed and unexposed groups in cohort and cross-sectional studies.

**Note:** An Explanation and Elaboration article discusses each checklist item and gives methodological background and published examples of transparent reporting. The STROBE checklist is best used in conjunction with this article (freely available on the Web sites of PLoS Medicine at <http://www.plosmedicine.org/>, Annals of Internal Medicine at <http://www.annals.org/>, and Epidemiology at <http://www.epidem.com/>). Information on the STROBE Initiative is available at [www.strobe-statement.org](http://www.strobe-statement.org).

# BMJ Open

## An observational study of the status of coronary risk biomarkers among Negritos with Metabolic Syndrome in East Coast Malaysia.

|                                 |                                                                                                                                                                                                                                                                                                                                                                                                                                                                                                                                                                                                                                                                                                                           |
|---------------------------------|---------------------------------------------------------------------------------------------------------------------------------------------------------------------------------------------------------------------------------------------------------------------------------------------------------------------------------------------------------------------------------------------------------------------------------------------------------------------------------------------------------------------------------------------------------------------------------------------------------------------------------------------------------------------------------------------------------------------------|
| Journal:                        | <i>BMJ Open</i>                                                                                                                                                                                                                                                                                                                                                                                                                                                                                                                                                                                                                                                                                                           |
| Manuscript ID                   | bmjopen-2018-021580.R1                                                                                                                                                                                                                                                                                                                                                                                                                                                                                                                                                                                                                                                                                                    |
| Article Type:                   | Research                                                                                                                                                                                                                                                                                                                                                                                                                                                                                                                                                                                                                                                                                                                  |
| Date Submitted by the Author:   | 15-Jun-2018                                                                                                                                                                                                                                                                                                                                                                                                                                                                                                                                                                                                                                                                                                               |
| Complete List of Authors:       | Mohd Mokhsin, Nurul Atiqah; Universiti Teknologi MARA, Faculty of Medicine<br>Mokhtar, Siti Shuhada; Universiti Teknologi MARA, Faculty of Medicine<br>Mohd Ismail, Aletza; Universiti Teknologi MARA, Faculty of Medicine<br>M. Nor, Fadzilah; Universiti Teknologi MARA, Faculty of Medicine<br>Shaari, Syahrul Azlin; Universiti Teknologi MARA, Faculty of Medicine<br>Nawawi, Hapizah; Universiti Teknologi MARA, Institute of Pathology, Forensic and Laboratory Medicine (I-PPerForM)<br>Yusoff, Khalid; UCSI University, Faculty of Medicine and Health Sciences<br>Rahman, Thuhairah; Universiti Teknologi MARA, Faculty of Medicine<br>Hoh, Boon Peng; UCSI University, Faculty of Medicine and Health Sciences |
| <b>Primary Subject Heading</b>: | Pathology                                                                                                                                                                                                                                                                                                                                                                                                                                                                                                                                                                                                                                                                                                                 |
| Secondary Subject Heading:      | Diabetes and endocrinology, Epidemiology, Public health                                                                                                                                                                                                                                                                                                                                                                                                                                                                                                                                                                                                                                                                   |
| Keywords:                       | Lipid disorders < DIABETES & ENDOCRINOLOGY, Hypertension < CARDIOLOGY, EPIDEMIOLOGY                                                                                                                                                                                                                                                                                                                                                                                                                                                                                                                                                                                                                                       |
|                                 |                                                                                                                                                                                                                                                                                                                                                                                                                                                                                                                                                                                                                                                                                                                           |

SCHOLARONE™  
Manuscripts

# **An observational study of the status of coronary risk biomarkers among Negritos with Metabolic Syndrome in East Coast Malaysia.**

**Atiqah Mokhsin<sup>1</sup>, Siti Shuhada Mokhtar<sup>1</sup>, Aletza Mohd. Ismail<sup>1</sup>, Fadzilah M. Nor<sup>1</sup>, Syahrul Azlin Shaari<sup>1</sup>, Hapizah Nawawi<sup>2</sup>, Khalid Yusoff<sup>3</sup>, Thuhairah Abdul Rahman<sup>1</sup>, Boon Peng Hoh<sup>3</sup>**

<sup>1</sup>Faculty of Medicine, Universiti Teknologi MARA, 47000 Sungai Buloh, Selangor, Malaysia

<sup>2</sup>Institute of Pathology, Forensic and Laboratory Medicine (I-PPerForM), Universiti Teknologi MARA, 47000 Sungai Buloh, Selangor, Malaysia

<sup>3</sup>Faculty of Medicine and Health Sciences, UCSI University, Jalan Menara Gading, Taman Connaught 56000 Kuala Lumpur, Wilayah Persekutuan Kuala Lumpur, Malaysia

## Correspondence:

1) Thuhairah Hasrah Abdul Rahman (Assigned corresponding author)

Faculty of Medicine, Universiti Teknologi MARA, Jalan Hospital, 47000 Sungai Buloh, Selangor

Tel : +603-61267637

Fax : +603-61265212

tootie74@yahoo.com

2) Hoh Boon Peng

Faculty of Medicine and Health Sciences, Jalan Menara Gading, Taman Connaught, 56000 Kuala Lumpur, Wilayah Persekutuan Kuala Lumpur, Malaysia

Tel: +603-91018880 (ext 3725)

Fax: +603-91023606

hohbp@ucsiuniversity.edu.my; hoh.boonpeng@gmail.com

Word count: 3,740 words

## ABSTRACT

**Objectives:** To determine the prevalence of Metabolic Syndrome (MS), ascertain the status of coronary risk biomarkers and establish the independent predictors of these biomarkers among the Negritos.

**Settings:** Health screening programme conducted in three inland settlements in East Coast Malaysia and Peninsular Malaysia.

**Participants:** Hundred and fifty (150) Negritos who were still living in three inland settlements in East Coast Malaysia and 1,227 Malays in Peninsular Malaysia. These participants were then categorized into MS and Non-MS groups based on the IDF consensus worldwide definition of MS and were recruited between 2010 and 2015. The participants were random and on voluntary basis.

**Primary and secondary outcome measures:** This study was a cross sectional study. Serum samples were collected for analysis of inflammatory (hsCRP), endothelial activation (sICAM-1) and prothrombogenesis [Lp(a)] biomarkers.

**Results:** MS was significantly higher among the Malays compared to Negritos (27.7% vs 12.0%). Amongst the Malays, MS subjects had higher hsCRP ( $p=0.01$ ) and sICAM-1 ( $p<0.05$ ) than their non-MS counterpart. There were no significant differences in all the biomarkers between MS and the non-MS Negritos. However, when compared between race, all biomarkers were higher in Negritos compared to Malays ( $p<0.001$ ). Binary logistic regression analysis affirmed that Negritos were an independent predictor for Lp(a) concentration ( $p<0.001$ ).

**Conclusions:** This study suggests that there may possibly be a genetic influence other than lifestyle which could explain the lack of difference in biomarkers concentration between MS and non-MS Negritos and for Negritos predicting Lp(a).

**Keywords:** Orang Asli; Aborigines; Coronary Artery Disease; Hypertension; Hypercholesterolaemia; Lp(a)

## ARTICLE SUMMARY

### Strengths and limitations of this study

1. Metabolic syndrome (MS) has become an increasing health problems contributing to non-communicable diseases, mainly due to high fat and carbohydrate diet shift and a sedentary lifestyle. Although few, there have been reports on the prevalence of metabolic diseases and biomarkers of atherogenesis among the indigenous populations from Peninsular Malaysia, known as the Orang Asli (OA). However, there is very scarce information on this among the inland OA settlements due to difficulties in accessing their tribes.
2. The strength of this study is gaining access to the earliest and smallest population of aboriginal or orang asli (OA) tribe in Malaysia, which is the inland dwelling Negrito, to determine the prevalence of MS and biomarkers of atherogenesis among these aboriginal people who have completely isolated themselves from influences of modernization.
3. To the best of our knowledge, this is one of the first study that assessed biomarkers of atherogenesis among the inland dwelling Negritos other than hsCRP.
4. Key findings from this research were that there were no difference in biomarkers of atherogenesis between MS and non-MS Negritos which interestingly contradicts findings among MS and non-MS Malays as well as established reports comparing the two cohorts. Furthermore, regression analysis highlights that Negritos independently predicted Lp(a) suggesting a possible genetic influence of this biomarker.

5. The small sample size of Negritos due to difficulties accessing remote tribes in addition to small population by nature poses a limitation to this study despite achieving a minimum sample size requirement. This could, in part, lead to the non-significant difference in inflammatory biomarkers between MS and non-MS Negritos.

## Ethics

Consent from the Department of Orang Asli Development (JaKOA) [JHEOA,PP.30.042.Jld5(17)] and Institutional ethics approval was granted by Universiti Teknologi MARA (UiTM) [600-RMI(5/1/6)] were obtained prior the initiation of this study. All methods were carried out in accordance with relevant guidelines and regulations. Written, informed consent was obtained from all subjects aged 18 years-old and above, prior to recruitment. Communications were done in Bahasa Malaysia with some input from local translators, either JaKOA officers or tribal leaders if and when required.

## Funding

- 1) The Ministry of Higher Education Malaysia under Fundamental Research Grant Scheme [Grant code: 600-RMI/FRGS 5/3 (136/2014)]
- 2) The Ministry of Higher Education Malaysia under Long Term Research Grant Scheme [Grant code: 600-RMI/LRGS 5/3 (2/2011)-2]

The funders had no role in study design, data collection and analysis, decision to publish, or preparation of the manuscript.

## Competing Financial Interests

The author(s) declare no competing financial interests.

## Data Sharing

No additional data available.



## INTRODUCTION

*Orang Asli* (OA) are the indigenous people believed to be the earliest inhabitants of Peninsular Malaysia. There are 18 OA tribes, categorized under three main groups according to their different languages and customs: Negrito, located the Northern part of the peninsula; Senoi, residing in the Central Region and Proto-Malays (or Aboriginal Malay), in the Southern Region. The OA constitutes 0.5% (150,000) of the total Malaysian population with Senoi representing the largest OA population (54%) followed by the Proto Malays (43%), and the Negrito (3%) [1].

Negritos, known to be the earliest OA tribe to arrive in Peninsular Malaysia, is believed to have occupied this region of Malaysia approximately 25,000 years ago [2]. A substantial group of the Negritos continue to practice nomadic lifestyle for reasons such as illness, food resources and intra-tribal feuds.

The poverty rate among OA is 76.9% with the majority of OA living in the jungles or rural areas, while a minority have moved into urban areas [3]. Although, the Malaysian Government have taken measures to eradicate the poverty level among the OAs which subsequently led to the reduction of poverty-associated diseases such as malaria, tuberculosis, AIDS and dental decay [3], to name a few; disorders such as metabolic syndrome (MS) and coronary artery disease (CAD) are not well addressed. This could most likely stem from the common misconception that these are 'diseases of the rich', when in fact, it is not exclusive to one type of socioeconomic group but transcends all walks of life [4,5].

MS, a major public health challenge, is a cluster of metabolic disturbances which result from a complex interaction between genetic and environmental factors [6]. MS is associated with increased risk of CAD [7]. The metabolic abnormalities that underlie the definition of MS include insulin resistance, central obesity, dyslipidaemia, hypertension and glucose intolerance [8]. The prevalence of MS among Malaysians was estimated between 37.1%-42.5% in 2008 [9].

It has also been well established that MS is associated with enhanced inflammation, endothelial activation and prothrombogenesis that are the key processes in atherosclerosis. Previous studies have documented the association between MS and enhanced inflammation [10]. Increases in proinflammatory cytokines such as interleukin-6 (IL-6), resistin and C-reactive protein (CRP) are due to the overproduction by monocyte-derived macrophages residing in the expanded adipose tissue mass [11]. NCEP-ATP reported higher soluble endothelial adhesion molecules such as intercellular adhesion molecule-1 (ICAM-1), vascular adhesion molecule-1 and E-selectin among subjects with MS [12]. Furthermore, various studies have also shown elevated lipoprotein (a) [Lp(a)] in MS subjects [13]. Lp(a) has been found to significantly reduce endogenous clot lysis in plasma ex vivo [14], possibly to its binding to fibrinogen and attenuating fibrin-mediated enhancement of tissue plasminogen activator of plasminogen [15].

Despite MS becoming a major public health concern with extensive data on this syndrome worldwide, reports on its prevalence in Malaysia remain scarce, particularly so among the OA in the country. There have been previous studies addressing factors related to MS globally in Malaysia [16], however, the samples used in these studies were

not a representative of the Malaysian population as they focused on the major ethnicities in Malaysia – Malay, Chinese and Indian, while the OA population was poorly represented.

To the best of our knowledge, there is only one recent published study that reported the urbanized Orang Seletar (a Proto-Malay subtribe) having the highest prevalence for central obesity ( $66.1\pm 5.9\%$ ) compared to the other subtribes who are less urbanized (Senoi and Negrito). The study also revealed that the prevalence for hypertension was highest among the Negritos ( $43.8\pm 9.3\%$  and  $51.2\pm 15.3\%$ ) who resided in most remote areas and were the leanest among the six OA subtribes investigated [1].

The lack of data on the prevalence of MS among OA specifically the Negritos, could most likely stem from the preconceived notion that they are not susceptible to the disorder due to their detachment from urbanization and their healthier lifestyle. Furthermore, there have been very few studies investigating the status of the biomarkers reflecting inflammation, endothelial activation and prothrombogenesis among the Negritos with MS. In addition, determining the MS components among them will further identify potential modifiable coronary risks such as hypertension, smoking, dyslipidaemia and glucose intolerance through proper education and healthcare services.

Therefore, this study aims to: 1) determine the MS components commonly seen among the Negrito, 2) elucidate the status of inflammation, endothelial activation and prothrombogenesis in Negrito and 3) identify the independent predictors for these biomarkers of coronary risk.

## SUBJECTS AND METHODS

### Patient and Public Involvement

All methods were carried out in accordance with relevant guidelines and regulations. Written, informed consent was obtained from all subjects aged 18 years-old and above, prior to recruitment. Communications were done in Bahasa Malaysia with some input from local translators, either JaKOA officers or tribal leaders if and when required.

150 Negrito subjects were recruited in this cross-sectional study. They were from Bateq and Mendriq sub-tribes, from three inland settlements in Gua Musang, Kelantan, East Coast Malaysia ( $4.8843^{\circ}\text{N}$ ,  $101.9682^{\circ}\text{E}$ ). 1,177 Malays were also recruited from various national health screening programmes in Malaysia. The subjects collected were randomly selected and was on a voluntary basis. These subjects were then categorized into Metabolic Syndrome (MS) and Non-Metabolic Syndrome (Non-MS) groups based on the IDF consensus worldwide definition of MS [17].

The sample size was calculated using PS Power and Sample Size Calculations version 3.0 [18] with a power of study at 99% and prevalence of MS among Negritos and Malays at  $15.2\pm 5\%$  [19] and  $38.8\pm 5\%$  [20] respectively. The minimum sample size calculated for Negritos and Malays are both 125. Due to the significant sample size difference between the two ethnic groups recruited and the relative difficulty in accessing the Negrito's remote locations of habitat, it is relevant to highlight that this study

1  
2  
3 conducted a within-ethnic group rather than a between-group comparison of the  
4 biomarkers of interest when subdivided between MS and non-MS.  
5

6 Demographic data was gathered by interview questionnaire. Information such as age,  
7 gender, tribe, education and occupation, health-related questions such as subjects' past  
8 medical history, social history including smoking status and were recorded. Family  
9 history of cardiometabolic and infectious diseases were also recorded.  
10

11 Topography measurements included blood pressure (BP), body mass index (BMI), waist  
12 circumference (WC) and waist-to-hip ratio (WHR). With the subject in a seated position  
13 and following 5-10 minutes of rest, BP was measured by an automated BP reader (cuff  
14 size 12 x 33cm, Colin press-mate, Japan). The systolic BP (SBP) and diastolic BP (DBP)  
15 were measured to the nearest 1mmHg. BMI was calculated using the formula:  
16  $BMI = \text{weight}(\text{kg}) / \text{height}^2(\text{m}^2)$ . WC was measured to the nearest 0.5cm using a measuring  
17 tape at midway between the inferior margin of the last rib and the iliac crest in a  
18 horizontal plane. Hip circumference measurement was taken around the pelvis at the  
19 point of maximal protrusion of the buttocks. Any visible stigmata of dyslipidaemia and  
20 diabetes mellitus were documented.  
21

22  
23 The results of this study were disseminated to participants through the JaKOA officers or  
24 using the postal address if provided. A physician was placed in the settings to provide an  
25 advice or referral letter when necessary.  
26

### 27 28 **Defining MS (IDF Criteria, 2006)** 29

30  
31 An individual was classified as having MS if central obesity was exhibited along with at  
32 least two of the following: (1) elevated triglyceride (TG) concentration of  $>1.7\text{mmol/L}$ , (2)  
33 reduced high-density lipoprotein cholesterol (HDL-c) of  $<1.0$  or  $1.3\text{mmol/L}$  in male and  
34 female respectively, (3) elevated BP of  $>140/90\text{mmHg}$ , and a raised fasting plasma  
35 glucose (FPG) of  $\geq 5.6\text{mmol/L}$ . Central obesity, using the suggested WC for Asian/South  
36 Asians, was defined as  $\geq 90\text{cm}$  and  $\geq 80\text{cm}$  for males and females respectively [17].  
37  
38

### 39 **Venous blood sampling and on-site biochemical analysis** 40

41 Venous blood samples were collected following a non-traumatic venepuncture between  
42 0800 and 1500h. Serum and plasma were separated by centrifugation at 3500rpm for 10  
43 minutes within 1 hour and stored at  $-20^{\circ}\text{C}$  before analyse.  
44  
45

### 46 **Biochemical Analysis** 47

48 Serum samples were sent to Centre for Pathology Diagnostic & Research Laboratories  
49 (CPDRL) of Faculty of Medicine, Universiti Teknologi MARA, Selangor, Malaysia. All  
50 clinical chemistry tests analyzed were MS ISO 15189:2014 accredited.  
51

52  
53 Cardiometabolic parameters tested were fasting serum lipids (FSL) which included total  
54 cholesterol (TC), TG and high density lipoprotein cholesterol (HDL-c) which were  
55 measured by enzymatic reference methods. Plasma glucose was analyzed by  
56 hexokinase method. All methods were run on an automated analyzer (Cobas Integra  
57  
58

400 PLUS, Roche Diagnostic, Germany) except for low density lipoprotein cholesterol (LDL-c) concentration which was derived using the Friedewald equation [21].

## **Analyses of Biomarkers of inflammation, endothelial activation and prothrombogenesis**

The biomarkers analyzed included hsCRP, sICAM-1 and Lp(a). Both hsCRP and Lp(a) were measured using turbidimetric method on an automated analyser (Cobas Integra 400 PLUS, Roche Diagnostics, Germany). Serum s-ICAM-1 concentration was determined by enzyme linked immunosorbent assay (ELISA) based on the measured optical density (eBioscience Bender MedSystems, Vienna Austria).

## **Data Analysis**

The associations of all three biomarkers were compared between two groups of MS and non-MS, using independent T-test, SPSS version 20. Binary logistic regression was performed on the independent variables (coronary risk biomarkers) to assess their impact on the likelihood that subjects would fall into each of the MS component (obesity, hypertension, diabetes mellitus, and low HDL-c or high TG concentrations). The specific model estimated from the data was:

$\text{logit (coronary risk biomarkers)} = \alpha + b_1(\text{age}) + b_2(\text{race}) + b_3(\text{gender}) + b_4(\text{smoking status}) + b_5(\text{BMI}) + b_6(\text{WC}) + b_7(\text{SBP}) + b_8(\text{DBP}) + b_9(\text{glucose concentration}) + b_{10}(\text{HDL-c concentration}) + b_{11}(\text{TG concentration})$ , where the dependent variable is logit coronary risk biomarkers,  $\alpha$  is the estimate for the intercept and  $b_1, b_2, \dots, b_{11}$  are estimates for the coefficients of the 11 predictors.

The variables were represented by two dummy variables to reflect the number of responses and reference categories. They were: race = Malay (1), Negrito (0), Negrito = reference group; gender, female (1), male (0) = reference group; smoking status, not smoking (1) and not smoking (0) = reference group; While for age, BMI, WC, SBP, DBP, glucose, HDL-c and TG concentrations were continuous variables.

## **RESULTS**

### **Demographic Data**

Table 1 summarizes the demographic parameters for the Malays and Negritos. 326 Malays (27.7%) and 18 Negritos (12.0%) were diagnosed with MS based on the IDF 2006 criteria. On a separate note, 15.5% Malays were diabetic while 1.5% of the Negritos had IFG  $\geq 5.6$ mmol/L or random plasma glucose of  $>11.0$ mmol/L. We observed that 43.9% of the Malays and 57.2% of the Negritos were hypertensive while 58.7% Malays and 14.0% Negritos had central obesity.

Among the Negritos, their MS counterpart had higher TC ( $5.30 \pm 1.05$  vs  $4.48 \pm 0.85$ mmol/L,  $p < 0.001$  respectively), TG ( $2.14 \pm 0.79$  vs  $1.41 \pm 0.68$ mmol/L,  $p < 0.001$  respectively) and LDL-c ( $3.36 \pm 0.69$  vs  $2.80 \pm 0.84$ mmol/L,  $p = 0.008$  respectively). The most frequent criteria diagnosing MS among the Negritos were hypertension, elevated

1  
2  
3 TG and low HDL-c and none of the Negritos diagnosed with MS had any form of glucose  
4 intolerance.  
5  
6  
7  
8  
9  
10  
11  
12  
13  
14  
15  
16  
17  
18  
19  
20  
21  
22  
23  
24  
25  
26  
27  
28  
29  
30  
31  
32  
33  
34  
35  
36  
37  
38  
39  
40  
41  
42  
43  
44  
45  
46  
47  
48  
49  
50  
51  
52  
53  
54  
55  
56  
57  
58  
59  
60

For peer review only

**Table 1: Demographic and clinical characteristics of the Negritos and Malays**

| Parameters                                 | Malays<br>(n = 1,177) |                   |         | Negrito<br>(n = 150) |                   |         |
|--------------------------------------------|-----------------------|-------------------|---------|----------------------|-------------------|---------|
|                                            | MS<br>(n=326)         | Non-MS<br>(n=851) | p value | MS<br>(n=18)         | Non-MS<br>(n=132) | p value |
| <sup>b</sup> Age (Years)                   | 49.53±11.77           | 40.00±14.69       | <0.001  | 30.56±11.11          | 31.29±11.00       | NS      |
| <sup>a</sup> Gender<br>(Males/Females)     | 45.1/54.9             | 37.3/62.7         | 0.02    | 5.6/94.4             | 59.1/40.9         | <0.001  |
| <sup>a</sup> Diabetes                      | 42.1                  | 5.6               | <0.001  | 0.00                 | 1.8               | NS      |
| <sup>b</sup> Plasma glucose<br>(mmol/L)    | 8.22±4.38             | 5.88±2.33         | <0.001  | 5.18±1.26            | 4.61±1.41         | NS      |
| <sup>a</sup> Hypertension                  | 83.2                  | 28.9              | <0.001  | 83.3                 | 53.5              | 0.02    |
| <sup>b</sup> SBP (mmHg)                    | 138.22±17.82          | 120.99±17.86      | <0.001  | 133.44±23.06         | 130.25±17.22      | NS      |
| <sup>b</sup> DBP (mmHg)                    | 83.49±10.63           | 73.69±11.42       | <0.001  | 81.39±12.87          | 81.09±13.41       | NS      |
| <sup>a</sup> Central Obesity               | 100                   | 42.9              | <0.001  | 100                  | 2.3               | <0.001  |
| <sup>b</sup> Waist<br>circumference (cm)   | 97.19±8.93            | 82.75±11.24       | <0.001  | 90.81±6.88           | 69.01±15.35       | <0.001  |
| <sup>b</sup> BMI (kg/m <sup>2</sup> )      | 30.57±4.90            | 24.94±4.77        | <0.001  | 26.31±3.26           | 19.75±2.55        | <0.001  |
| <sup>a</sup> Current smoker                | 16.9                  | 13.2              | NS      | 23.5                 | 46.8              | NS      |
| <sup>b</sup> Total cholesterol<br>(mmol/L) | 5.38±1.00             | 5.05±0.96         | <0.001  | 5.30±1.05            | 4.48±0.85         | <0.001  |
| <sup>b</sup> Triglyceride<br>(mmol/L)      | 2.70±1.54             | 1.41±0.82         | <0.001  | 2.14±0.79            | 1.41±0.68         | <0.001  |
| <sup>b</sup> LDL-c (mmol/L)                | 3.10±0.76             | 2.99±0.76         | 0.03    | 3.36±0.69            | 2.80±0.84         | 0.008   |
| <sup>b</sup> HDL-c (mmol/L)                | 1.08±0.31             | 1.42±0.37         | <0.001  | 0.98±0.38            | 1.01±0.28         | NS      |

**Notes:** <sup>a</sup> Data expressed as percentage; <sup>b</sup> Data expressed as Mean±SD

**Abbreviations:** SBP, systolic blood pressure; DBP, diastolic blood pressure; BMI, Body mass index; NS, not significant

## Comparison of the biomarkers of inflammation, endothelial activation and prothrombogenesis in Malay and Negrito subjects (Table 2)

There was no significant differences between MS and non-MS among Negritos for all biomarkers ( $p>0.05$ ) whereas MS Malays illustrated higher hsCRP (mean $\pm$ SD=1.88 $\pm$ 1.16 vs 1.26 $\pm$ 1.13mg/L,  $p<0.001$  respectively) and sICAM-1 (mean $\pm$ SD=531.73 $\pm$ 185.73 vs 465.46 $\pm$ 202.08ng/mL,  $p<0.001$  respectively) concentrations compared to their Non-MS counterpart. When comparing between Negritos and Malays, Negritos showed significantly higher concentrations of hsCRP (mean $\pm$ SD=2.27 $\pm$ 2.25 vs 1.41 $\pm$ 1.17mg/L,  $p<0.001$  respectively), sICAM-1 (mean $\pm$ SD=684.85 $\pm$ 388.03 vs 482.25 $\pm$ 200.05ng/mL,  $p<0.001$  respectively) and Lp(a) (mean $\pm$ SD=0.22 $\pm$ 0.22 vs 0.06 $\pm$ 0.04mg/L,  $p<0.001$  respectively).

**Table 2: Concentrations of inflammatory, endothelial activation and prothrombogenesis biomarkers in MS and non-MS Malays and Negritos**

| Biomarkers         | Malays<br>(n = 1,177) |                     |            | Negrito<br>(n = 150) |                     |            |
|--------------------|-----------------------|---------------------|------------|----------------------|---------------------|------------|
|                    | MS<br>(n=326)         | Non-MS<br>(n=851)   | p<br>value | MS<br>(n=18)         | Non-MS<br>(n=132)   | p<br>value |
| hsCRP<br>(mg/L)    | 1.88 $\pm$ 1.16       | 1.26 $\pm$ 1.13     | <0.001     | 4.21 $\pm$ 3.20      | 2.06 $\pm$ 2.04     | NS         |
| sICAM-1<br>(ng/mL) | 531.73 $\pm$ 185.76   | 465.46 $\pm$ 202.08 | <0.001     | 670.06 $\pm$ 377.27  | 688.84 $\pm$ 390.97 | NS         |
| Lp(a) (g/L)        | 0.06 $\pm$ 0.04       | 0.06 $\pm$ 0.04     | NS         | 0.23 $\pm$ 0.26      | 0.22 $\pm$ 0.22     | NS         |

**Notes:** Data expressed as Mean  $\pm$  SD

**Abbreviations:** NS, not significant

## Independent predictors of the biomarkers of inflammation, endothelial activation and prothrombogenesis in Malay and Negrito subjects (Table 3)

To further determine the independent predictors of these biomarkers, binary logistic regression analyses were performed with the biomarkers as dependent variables. It was found that BMI ( $p=0.016$ ), FPG ( $p<0.001$ ) and DBP ( $p=0.042$ ) were independent predictors for hsCRP whilst the Negrito determined Lp(a) ( $p<0.001$ ) when taken account all subjects after adjusting for age, gender, DM, hypertension, smoking status and BMI.

Among the Malays, it was found that male ( $p<0.001$ ), BMI ( $p<0.001$ ) and FPG concentration ( $p<0.001$ ) predicted for hsCRP whilst male ( $p=0.040$ ) and FPG ( $p=0.039$ ) predicted Lp(a) after adjusting for the same parameters. There were no independent predictors for any of these biomarkers among Negritos.

**Table 3: Predictors for hsCRP and Lp(a)**

| Groups           | Variables | Independent predictor      | Beta  | Adjusted OR | 95% CI Lower, Upper | p value |
|------------------|-----------|----------------------------|-------|-------------|---------------------|---------|
| (a) All Subjects | hsCRP     | 1) BMI ( $\text{kg/m}^2$ ) | 0.05  | 1.05        | 1.01, 1.10          | 0.016   |
|                  |           | 2) Glucose (mmol/L)        | 0.15  | 1.16        | 1.12, 1.19          | <0.001  |
|                  |           | 3) Diastolic (mmHg)        | 0.01  | 1.01        | 1.00, 1.02          | 0.042   |
|                  | Lp(a)     | 1) Race (Negrito)          | 1.03  | 2.79        | 1.87, 4.14          | <0.001  |
| (b) Malays       | hsCRP     | 1) Gender (male)           | -0.64 | 0.53        | 0.39, 0.71          | <0.001  |
|                  |           | 2) BMI ( $\text{kg/m}^2$ ) | 0.18  | 1.20        | 1.16, 1.24          | <0.001  |
|                  |           | 3) Glucose (mmol/L)        | 0.08  | 1.08        | 1.04, 1.13          | <0.001  |
|                  | Lp(a)     | 1) Gender (Male)           | -0.56 | 0.57        | 0.39, 0.84          | 0.004   |
|                  |           | 2) Glucose (mmol/L)        | -0.08 | 0.93        | 0.86, 1.00          | 0.039   |

**Notes:** The model reasonably fits well. Model assumptions are met. There are no interaction and multicollinearity problem.



## DISCUSSION

MS is defined by an aggregation of atherosclerotic factors, mainly central obesity, hypertension, glucose intolerance and dyslipidaemia which, in combination, enhance the probability of developing type 2 DM and CAD [22]. In two European studies [23,24], the presence of MS predicted increased CAD mortality. These findings are not unexpected considering MS comprises of established risk factors for CAD such as hypertension, impaired glucose tolerance, low HDL-c concentration, elevated TG concentration and obesity, which enhances endothelial activation and inflammation, key processes in atherogenesis. Furthermore, coronary risk biomarkers are strongly associated with endothelial dysfunction [25] and thrombosis [26] and are elevated in patients with atherosclerosis-related disease such as CAD [27] and peripheral artery disease [28] in previous reports.

There have been several previous reports determining the prevalence of non-communicable diseases (NCD) such as DM, hypertension, dyslipidaemia and obesity among OA subjects. A previous report on the health status of Lanoh ethnic sub-groups of OA showed that 8.9% were recently diagnosed with hypertension, 6.7% had hypertension and DM and an alarming 26.7% had pre-obesity [29]. A larger population study done identified central obesity and hypertension among OA sampled from seven different subtribes and eight settlements [1]. What is more alarming is the report by Aziz et al (2016) which highlighted the higher percentage of OA having high insulin levels, hsCRP and higher percentage categorized as high risk by the Framingham Risk Score which forecasts 10-year risk of CAD [30]. These reports strongly imply that NCDs such as hypertension, dyslipidaemia, central obesity and DM – which are clusters of metabolic factors associated with MS, have gradually led to the increase in CAD risk among OA.

Although several reports highlighted the increasing prevalence of NCDs among OA in Malaysia, there is scarce research that extended to investigate biomarkers for coronary risk amongst this population. To the best of our knowledge, there is only one other study which reported the status of inflammatory biomarker among OA in Peninsular Malaysia compared to Malays [30]. Our study further explored other biomarkers reflecting atherogenesis such as endothelial activation and prothrombogenesis. This study showed that biomarkers of inflammation (hsCRP) and endothelial activation (sICAM-1) were enhanced in MS Malays compared to their Non-MS counterpart. These findings are expected and in keeping with previous studies denoting the higher CAD risk among MS [17,30]. The association of MS with inflammation and endothelial activation is also well documented [12,31]. The elevated sICAM-1 seen among MS Malays could be attributed to higher prevalence of hypertension, obesity and dyslipidaemia compared to their non-MS counterpart which is parallel with previous reports [31,32].

However, we were unable to observe any statistical difference in the concentrations of biomarkers of inflammation, endothelial activation and prothrombogenesis between MS and non-MS among the Negritos. This contradicts previous reports underscoring enhanced inflammation among OAs [30]. These inconsistent findings could be attributed to the small sample size of Negritos in comparing the biomarkers, although the minimum sample size calculated was achieved. Furthermore, a previous study conducted to determine the prevalence of MS in an OA population found that the prevalence of MS among inland Negritos to be 12.5% which is consistent with our findings of 12% among

1  
2  
3 our Negrito population [19]. The population differences between the previous study and  
4 ours could also have led to these differences, where we recruited mainly inland Negritos  
5 in the northern state of Malaysia where majority of them are distributed, while the  
6 previous study recruited OAs from a mixture of inland and peripheries of towns where  
7 urbanization could have influenced lifestyle which could enhance inflammation and  
8 insulin resistance [30].  
9

10 In addition, as a general index of inflammation, CRP concentrations have been shown to  
11 vary by ethnicity and within ethnic groups by fitness, as it was reported to be higher in  
12 healthy Indian Asians than in European white people and were related to greater central  
13 obesity and insulin resistance in Indian Asians [33]. Furthermore, none of the Negritos  
14 diagnosed with MS had any form of glucose intolerance which could possibly explain  
15 these inconsistent findings as there have been reports on the association between CRP  
16 and sICAM-1 with MS, hypertension, and DM [34,35]. It is also worth highlighting that  
17 when comparing these biomarkers between Negritos and Malays, we observed higher  
18 concentrations of all three biomarkers among the younger aged Negrito subjects  
19 compared to the Malays. This suggests that the Negritos may be at higher risk of CAD at  
20 a younger age group hence warrants further investigation.  
21  
22

23 Furthermore, findings from this study suggest that the MS Negritos despite having  
24 coronary risk factor including hypertension and dyslipidaemia, the failure to exhibit  
25 enhanced atherogenesis compared to their non-MS counterpart could possibly be  
26 attributed to genetic and/or lifestyle influences which could play a role in attenuating  
27 atherogenesis. The Negritos included in this study were located in remote areas of  
28 Northern Peninsular Malaysia and to certain extent, still practicing the hunter gatherers  
29 lifestyle, and living isolated from urbanization, thus may have contributed to the  
30 differences observed in the biomarkers between the two races when comparing with the  
31 MS and non-MS counterparts. This is in keeping with previous studies which reported  
32 improved inflammatory, endothelial activation and prothrombogenesis status in MS  
33 subjects, following aggressive lifestyle modification which included dietary improvement  
34 and initiation and maintenance of exercise [36,37].  
35  
36

37 One possible postulating genetic factor that may contribute to this finding is the genetic  
38 variation of the candidate gene *CDH13*. Recent population genomic studies on the  
39 Negritos have identified a strong and consistent positive natural selection signal  
40 spanning the genomic region which harbours *CDH13* [38,39]. This implies that the  
41 genetic profile of this gene in the Negritos were significantly differentiated from the rest  
42 of the populations. *CDH13* encodes for protein T-Cadherin which belongs to the  
43 cadherin superfamily of the transmembrane proteins that mediate calcium-dependent  
44 intercellular adhesion, is the receptor for the high molecular weight adiponectin  
45 expressed in the vasculature [40] and cardiac myocytes [41]. Genetic variation of this  
46 gene has been shown to influence metabolic outcome and possibly provides  
47 atherogenesis resistant [39,42,43]. Adiponectin plays a crucial role in the metabolic  
48 regulation of obesity, insulin sensitivity and atherosclerosis and several studies have  
49 indicated its anti-atherogenic properties [44]. A recent study reported that minor allele of  
50 rs12051272 revealed a considerable association with a more favourable metabolic  
51 profile, including higher insulin sensitivity, HDL-c, lower DBP, FPG and TG  
52 concentrations [42]. Given the phenotypic observations and the role of this gene, we  
53 postulate a plausibility of *CDH13* regulating the phenotype and could explain the findings  
54 observed in our study whereby despite fulfilling criteria for MS, these Negritos subjects  
55 did not exhibit augmented inflammatory or endothelial activation status when compared  
56  
57

1  
2  
3 to their non-MS counterpart. Future studies exploring expressions of genetic variants of  
4 *CDH13* in these Negritos cohorts could further shed light on influences of this gene on  
5 atherogenesis.  
6

7 Regression analysis has shown that Negrito race independently predicts Lp(a) in this  
8 study. This finding imply that despite having a healthier lifestyle by being hunter  
9 gatherers and relatively isolated from modernization, suggests that serum Lp(a)  
10 concentrations are not influenced by diet or lifestyle, but more significantly by variants in  
11 the *LPA* gene. This is in parallel with previous studies that have shown significant  
12 difference in Lp(a) levels among various races including Asian Indian, Chinese, Non-  
13 Hispanic and blacks [45,46]. Studies have demonstrated the presence of *LPA* gene  
14 polymorphisms primarily determining levels of Lp(a), without significant dietary or  
15 environmental effects [47]. Further studies are warranted to identify common  
16 polymorphisms in *LPA* gene among Negritos and other OA tribes which would further  
17 validate these inferences.  
18

19  
20 The main constraint of this study was the small sample size of the Negrito group which  
21 prevented us from comparing between ethnicities. Although the sample size included  
22 was enough to reject the null hypothesis, a larger sample size could provide a better  
23 representation of the Negrito population. However, it should be reiterated that Negrito  
24 represents only 3% of the total OA population in Malaysia and an even smaller  
25 percentage of that embodies the inland dwellers that are not subjected to urbanization.  
26 This along with major physical problems accessing all these remote tribes prevented us  
27 from having a larger sample to analyze.  
28

## 29 30 31 **CONCLUSION** 32

33 This study highlights several key findings that provide further insights into the metabolic  
34 differences between the inland-living aboriginal group, Negritos, in Malaysia and  
35 urbanized Malays in Malaysia. Firstly, MS and Non-MS Negritos failed to show  
36 differences in biomarkers of coronary risks as established by previous reports. Although  
37 the small Negrito sample could be a contributor to this observation, genetic or lifestyle  
38 influence cannot be ruled out. This warrants further studies to confirm these  
39 observations and, if replicated, paves way to future research to understand the  
40 mechanism behind this discrepancy. Secondly, Negritos independently predicting serum  
41 Lp(a) concentrations suggests a genetic influence that surpasses any form of impact by  
42 diet and lifestyle which needs further exploration. Therefore, future studies to identify  
43 common variants of *LPA* gene among this group and to extend such research to other  
44 Aborigine tribes would further improve our understanding of interaction between gene  
45 and phenotypic expression of Lp(a).  
46  
47  
48  
49

## 50 51 **ACKNOWLEDGMENTS** 52

53 The authors would like to express their appreciation to the Centre for Pathology  
54 Diagnostic and Research Laboratories (CPDRL) of Faculty of Medicine, Universiti  
55  
56  
57

Teknologi MARA for providing the facilities to conduct this research and all of the subjects who were voluntarily participate in this study.

## CONTRIBUTORSHIP STATEMENT

A.M collected the subjects, performed the experiments, analyzed the samples and data, prepared the tables, wrote the manuscript and reviewed drafts of the paper.

S.S.M collected the subjects, analyzed the samples and reviewed drafts of the paper.

A.M.I collected the subjects, validated results and reviewed drafts of the paper.

F.M.N, S.A.S and K.Y collected the subjects and reviewed drafts of the paper.

H.N collected the subjects, contributed reagents and materials and reviewed drafts of the paper.

T.R conceived and designed the experiments, collected the subjects, contributed reagents and materials, wrote the manuscript and reviewed drafts of the paper.

B.P.H conceived and designed the experiments, collected the subjects, validated results, contributed reagents and materials and reviewed drafts of the paper.

## REFERENCES

- 1 Phipps ME, Chan KKL, Naidu R, *et al.* Cardio-metabolic health risks in indigenous populations of Southeast Asia and the influence of urbanization. *BMC Public Health* 2015;**15**:1–8. doi:10.1186/s12889-015-1384-3
- 2 Masron T, Masami F, Ismail N. Orang Asli in Peninsular Malaysia: Population, Spatial Distribution and Socio-Economic Condition. *J Ritsumeikan Soc Sci Humanit* 2013;**6**:75–115.
- 3 Lim YAL, Romano N, Colin N, *et al.* Intestinal parasitic infections amongst orang asli (indigenous) in malaysia: Has socioeconomic development alleviated the problem? *Trop Biomed* 2009;**26**:110–22.
- 4 Weng X, Liu Y, Ma J, *et al.* An urban–rural comparison of the prevalence of the metabolic syndrome in Eastern China. *Public Health Nutr* 2007;**10**:131–6. doi:10.1017/S1368980007226023
- 5 Prabhakaran D, Chaturvedi V, Shah P, *et al.* Differences in the prevalence of metabolic syndrome in urban and rural India: a problem of urbanization. *Chronic Illn* 2007;**3**:8–19. doi:10.1177/1742395307079197
- 6 Ordovas JM. Genetic links between diabetes mellitus and coronary atherosclerosis. *Curr Atheroscler Rep* 2007;**9**:204–10.
- 7 Zambon A, Pauletto P, Crepaldi G. Review article: the metabolic syndrome - a chronic cardiovascular inflammatory condition. *Aliment Pharmacol Ther* 2005;**22**:20–3. doi:10.1111/j.1365-2036.2005.02589.x
- 8 Eckel RH, Grundy SM, Zimmet PZ. The metabolic syndrome. *Lancet* 2005;**365**:1415–28. doi:10.1016/S0140-6736(09)61794-3
- 9 Mohamud WNW, Ismail A al S, Khir ASM, *et al.* Prevalence of metabolic syndrome and its risk factors in adult Malaysians: Results of a nationwide survey. *Diabetes Res Clin Pract* 2012;**96**:91–7. doi:10.1016/j.diabres.2011.11.020
- 10 Fuentes E, Fuentes F, Vilahur G, *et al.* Mechanisms of chronic state of inflammation as mediators that link obese adipose tissue and metabolic syndrome. *Mediators Inflamm* 2013;**2013**:136584. doi:10.1155/2013/136584
- 11 Weisberg SP, McCann D, Desai M, *et al.* Obesity is associated with macrophage

- accumulation in adipose tissue. *J Clin Invest* 2003;**112**:1796–808. doi:10.1172/JCI200319246
- 12 Mottillo S, Filion KB, Genest J, *et al.* The metabolic syndrome and cardiovascular risk: A systematic review and meta-analysis. *J Am Coll Cardiol* 2010;**56**:1113–32. doi:10.1016/j.jacc.2010.05.034
- 13 Bermúdez V, Rojas J, Salazar J, *et al.* Variations of Lipoprotein ( a ) Levels in the Metabolic Syndrome: A Report from the Maracaibo City Metabolic Syndrome Prevalence Study. 2013;**2013**.
- 14 Loscalzo J. Review Lipoprotein(a): A unique risk factor for atherothrombotic disease. *Arterioscler Thromb Vasc Biol* 1993;**10**:672–9. doi:\url{10.1161/01.ATV.10.5.672}
- 15 Loscalzo J, Weinfeld M, Fless GM, *et al.* Lipoprotein(a), fibrin binding, and plasminogen activation. *Arterioscler Thromb Vasc Biol* 1990;**10**:240–5. <http://atvb.ahajournals.org/content/10/2/240?download=true> (accessed 8 Apr 2017).
- 16 Ghee LK, Kooi CW. A review of metabolic syndrome research in Malaysia. *Med J Malaysia* 2016;**71**:20–8.
- 17 Alberti SG, Zimmet P, Shaw J, *et al.* The IDF Consensus Worldwide Definition of the Metabolic Syndrom. 2006. [https://www.idf.org/webdata/docs/IDF\\_Meta\\_def\\_final.pdf](https://www.idf.org/webdata/docs/IDF_Meta_def_final.pdf)
- 18 Dupont WD, Plummer WD. Power and sample size calculations. *Control Clin Trials* 1990;**11**:116–28. doi:10.1016/0197-2456(90)90005-M
- 19 Ashari LS, Mitra AK, Rahman TA, *et al.* Prevalence and risk factors of metabolic syndrome among an endangered tribal population in Malaysia using harmonized IDF criteria. *Int J Diabetes Dev Ctries* 2016;**36**:352–8. doi:10.1007/s13410-016-0487-4
- 20 Mohamud WNW, Ismail A al-S, Khir ASM, *et al.* Prevalence of metabolic syndrome and its risk factors in adult Malaysians: results of a nationwide survey. *Diabetes Res Clin Pract* 2011;**91**:91–7. doi:10.1016/j.diabres.2011.11.020
- 21 Friedewald WT, Levy RI, Fredrickson DS. Estimation of the concentration of low-density lipoprotein cholesterol in plasma, without use of the preparative ultracentrifuge. *Clin Chem* 1972;**18**:499–502. doi:10.1177/107424840501000106
- 22 Alberti KGMM, Eckel RH, Grundy SM, *et al.* Harmonizing the metabolic syndrome: A joint interim statement of the international diabetes federation task force on epidemiology and prevention; National heart, lung, and blood institute; American heart association; World heart federation; International . *Circulation* 2009;**120**:1640–5. doi:10.1161/CIRCULATIONAHA.109.192644
- 23 Isomaa B, Almgren P, Tuomi T, *et al.* Cardiovascular morbidity and mortality associated with the metabolic syndrome. *Diabetes Care* 2001;**24**:683–9. doi:10.2337/diacare.24.4.683
- 24 Lakka H, Laaksonen DE, Lakka TA. The Metabolic Syndrome and Total and Cardiovascular Disease Mortality in Middle-aged Men. 2010;**288**:2709–16. doi:10.1001/jama.288.21.2709
- 25 Odegaard AO, Jacobs DR, Sanchez OA, *et al.* Oxidative stress, inflammation, endothelial dysfunction and incidence of type 2 diabetes. *Cardiovasc Diabetol* 2016;**15**:51. doi:10.1186/s12933-016-0369-6
- 26 Tuttolomondo A, Pecoraro R, Casuccio A, *et al.* Peripheral frequency of CD4+ CD28-cells in acute ischemic stroke relationship with stroke subtype and severity markers. *Med (United States)* 2015;**94**:1–8. doi:10.1097/MD.0000000000000813
- 27 Subirana I, Fitó M, Diaz O, *et al.* Prediction of coronary disease incidence by biomarkers of inflammation, oxidation, and metabolism. *Sci Rep* 2018;**8**:3191.

- doi:10.1038/s41598-018-21482-y
- 28 Signorelli SS, Anzaldi M, Libra M, *et al.* Plasma Levels of Inflammatory Biomarkers in Peripheral Arterial Disease. *Angiology* 2016;**67**:870–4. doi:10.1177/0003319716633339
- 29 Cheng YX, Chong CP, Kiew CF, *et al.* An assessment of health and social-economic status among Lanoh ethnic sub-group of Orang Asli (indigenous peoples) in Air Bah I village, state of Perak, Malaysia. *J Appl Pharm Sci* 2014;**4**:32–7. doi:10.7324/JAPS.2014.40106
- 30 Tuan Abdul Aziz TA, Teh LK, Md Idris MH, *et al.* Increased risks of cardiovascular diseases and insulin resistance among the Orang Asli in Peninsular Malaysia. *BMC Public Health* 2016;**16**:284. doi:10.1186/s12889-016-2848-9
- 31 Weiss TW, Arnesen H, Seljeflot I. Components of the Interleukin-6 transsignalling system are associated with the metabolic syndrome, endothelial dysfunction and arterial stiffness. *Metabolism* 2013;**62**:1008–13. doi:10.1016/j.metabol.2013.01.019
- 32 Brake DK, Smith EO, Mersmann H, *et al.* ICAM-1 expression in adipose tissue: effects of diet-induced obesity in mice 3. *Am J Physiol Cell Physiol* 2006;**291**:C1232–9. doi:10.1152/ajpcell.00008.2006.
- 33 Tang L, Peng H, Xu T, *et al.* Association of Biomarkers of Inflammation with Dyslipidemia and Its Components among Mongolians in China. *PLoS One* 2014;**9**:e89023. doi:10.1371/journal.pone.0089023
- 34 Mazidi M, Toth PP, Banach M. C-reactive Protein Is Associated With Prevalence of the Metabolic Syndrome, Hypertension, and Diabetes Mellitus in US Adults. *Angiology* 2018;**69**:438–42. doi:10.1177/0003319717729288
- 35 Ferreira I, Hovind P, Schalkwijk CG, *et al.* Biomarkers of inflammation and endothelial dysfunction as predictors of pulse pressure and incident hypertension in type 1 diabetes: a 20 year life-course study in an inception cohort. *Diabetologia* 2018;**61**:231–41. doi:10.1007/s00125-017-4470-5
- 36 Antonio F, Fonseca H, Cristina De Oliveira Izar M. High-Sensitivity C-Reactive Protein and Cardiovascular Disease Across Countries and Ethnicities. *Clinics* 2016;**71**:235–42. doi:10.6061/clinics/2016(04)11
- 37 Tuttolomondo A, Di Raimondo D, Pecoraro R, *et al.* Atherosclerosis as an inflammatory disease. *Curr Pharm Des* 2012;**18**:4266–88.
- 38 Deng L, Hoh BP, Lu D, *et al.* The population genomic landscape of human genetic structure, admixture history and local adaptation in Peninsular Malaysia. *Hum Genet* 2014;**133**:1169–85. doi:10.1007/s00439-014-1459-8
- 39 Liu X, Yunus Y, Lu D, *et al.* Differential positive selection of malaria resistance genes in three indigenous populations of Peninsular Malaysia. *Hum Genet* 2015;**134**:375–92. doi:10.1007/s00439-014-1525-2
- 40 W. Hebbard L, Garlatti M, J.T. Young L, *et al.* T-cadherin Supports Angiogenesis and Adiponectin Association with the Vasculature in a Mouse Mammary Tumor Model. *Cancer Res* 2008;**65**:1407–16.
- 41 Denzel MS, Scimia M, Zumstein PM, *et al.* T-cadherin is critical for adiponectin-mediated cardioprotection in mice. *J Clin Invest* 2010;**120**:4342–52. doi:10.1172/JCI43464DS1
- 42 Teng MS, Hsu LA, Wu S, *et al.* Association of CDH13 genotypes/haplotypes with circulating adiponectin levels, metabolic syndrome, and related metabolic phenotypes: The role of the suppression effect. *PLoS One* 2015;**10**:1–13. doi:10.1371/journal.pone.0122664
- 43 Gao H, Kim YM, Chen P, *et al.* Genetic variation in cdh13 is associated with lower plasma adiponectin levels but greater adiponectin sensitivity in east asian

- 1  
2  
3 populations. *Diabetes* 2013;**62**:4277–83. doi:10.2337/db13-0129
- 4 44 Matsuzawa Y, Funahashi T, Kihara S, *et al.* Adiponectin and Metabolic Syndrome.  
5 *Arterioscler Thromb Vasc Biol* 2004;**24**:29–33.  
6 doi:10.1161/01.ATV.0000099786.99623.EF
- 7 45 Banerjee D, Wong EC, Shin J, *et al.* Racial and Ethnic Variation in Lipoprotein (a)  
8 Levels among Asian Indian and Chinese Patients. *J Lipids* 2011;**2011**:291954.  
9 doi:10.1155/2011/291954
- 10 46 Guyton JR, Dahlen GH, Patsch W, *et al.* Relationship of plasma lipoprotein Lp(a)  
11 levels to race and to apolipoprotein B. *Arteriosclerosis* 1985;**5**:265–  
12 72.<http://www.ncbi.nlm.nih.gov/pubmed/3158297>
- 13 47 Tsimikas S, Hall JL. Lipoprotein(a) as a potential causal genetic risk factor of  
14 cardiovascular disease: A rationale for increased efforts to understand its  
15 pathophysiology and develop targeted therapies. *J Am Coll Cardiol* 2012;**60**:716–  
16 21. doi:10.1016/j.jacc.2012.04.038  
17  
18  
19  
20  
21  
22  
23  
24  
25  
26  
27  
28  
29  
30  
31  
32  
33  
34  
35  
36  
37  
38  
39  
40  
41  
42  
43  
44  
45  
46  
47  
48  
49  
50  
51  
52  
53  
54  
55  
56  
57  
58  
59  
60

**STROBE Statement****An observational study of the status of coronary risk biomarkers among Negritos with Metabolic Syndrome in East Coast Malaysia.**

| Section                      | Item No | Recommendation                                                                                                                                                                                                                                                                                                                                                                                                                                                         | Page |
|------------------------------|---------|------------------------------------------------------------------------------------------------------------------------------------------------------------------------------------------------------------------------------------------------------------------------------------------------------------------------------------------------------------------------------------------------------------------------------------------------------------------------|------|
| <b>Title and abstract</b>    | 1       | (a) Indicate the study's design with a commonly used term in the title or the abstract                                                                                                                                                                                                                                                                                                                                                                                 | 1    |
|                              |         | (b) Provide in the abstract an informative and balanced summary of what was done and what was found                                                                                                                                                                                                                                                                                                                                                                    | 2    |
| <b>Introduction</b>          |         |                                                                                                                                                                                                                                                                                                                                                                                                                                                                        |      |
| Background/rationale         | 2       | Explain the scientific background and rationale for the investigation being reported                                                                                                                                                                                                                                                                                                                                                                                   | 4-5  |
| Objectives                   | 3       | State specific objectives, including any prespecified hypotheses                                                                                                                                                                                                                                                                                                                                                                                                       | 5    |
| <b>Methods</b>               |         |                                                                                                                                                                                                                                                                                                                                                                                                                                                                        |      |
| Study design                 | 4       | Present key elements of study design early in the paper                                                                                                                                                                                                                                                                                                                                                                                                                | 5    |
| Setting                      | 5       | Describe the setting, locations, and relevant dates, including periods of recruitment, exposure, follow-up, and data collection                                                                                                                                                                                                                                                                                                                                        | 5    |
| Participants                 | 6       | (a) <i>Cohort study</i> —Give the eligibility criteria, and the sources and methods of selection of participants. Describe methods of follow-up<br><i>Case-control study</i> —Give the eligibility criteria, and the sources and methods of case ascertainment and control selection. Give the rationale for the choice of cases and controls<br><i>Cross-sectional study</i> —Give the eligibility criteria, and the sources and methods of selection of participants | 5    |
|                              |         | (b) <i>Cohort study</i> —For matched studies, give matching criteria and number of exposed and unexposed<br><i>Case-control study</i> —For matched studies, give matching criteria and the number of controls per case                                                                                                                                                                                                                                                 |      |
| Variables                    | 7       | Clearly define all outcomes, exposures, predictors, potential confounders, and effect modifiers. Give diagnostic criteria, if applicable                                                                                                                                                                                                                                                                                                                               | 6-7  |
| Data sources/<br>measurement | 8*      | For each variable of interest, give sources of data and details of methods of assessment (measurement). Describe comparability of assessment methods if there is more than one group                                                                                                                                                                                                                                                                                   | 6-7  |
| Bias                         | 9       | Describe any efforts to address potential sources of bias                                                                                                                                                                                                                                                                                                                                                                                                              | 5    |
| Study size                   | 10      | Explain how the study size was arrived at                                                                                                                                                                                                                                                                                                                                                                                                                              | 5    |
| Quantitative variables       | 11      | Explain how quantitative variables were handled in the analyses. If applicable, describe which groupings were chosen and why                                                                                                                                                                                                                                                                                                                                           | 5-7  |
| Statistical methods          | 12      | (a) Describe all statistical methods, including those used to control for confounding                                                                                                                                                                                                                                                                                                                                                                                  | 7    |
|                              |         | (b) Describe any methods used to examine subgroups and interactions                                                                                                                                                                                                                                                                                                                                                                                                    | 6-7  |
|                              |         | (c) Explain how missing data were addressed                                                                                                                                                                                                                                                                                                                                                                                                                            |      |
|                              | 12      | (d) <i>Cohort study</i> —If applicable, explain how loss to follow-up was addressed<br><i>Case-control study</i> —If applicable, explain how matching of cases and controls was addressed<br><i>Cross-sectional study</i> —If applicable, describe analytical methods taking account of sampling strategy                                                                                                                                                              | 5-6  |
|                              |         | (e) Describe any sensitivity analyses                                                                                                                                                                                                                                                                                                                                                                                                                                  |      |

Continued on next page



**STROBE Statement****An observational study of the status of coronary risk biomarkers among Negritos with Metabolic Syndrome in East Coast Malaysia.**

|                          |     |                                                                                                                                                                                                                                                                                                                                                                                                               |              |
|--------------------------|-----|---------------------------------------------------------------------------------------------------------------------------------------------------------------------------------------------------------------------------------------------------------------------------------------------------------------------------------------------------------------------------------------------------------------|--------------|
| <b>Results</b>           |     |                                                                                                                                                                                                                                                                                                                                                                                                               |              |
| Participants             | 13* | (a) Report numbers of individuals at each stage of study—eg numbers potentially eligible, examined for eligibility, confirmed eligible, included in the study, completing follow-up, and analysed<br>(b) Give reasons for non-participation at each stage<br>(c) Consider use of a flow diagram                                                                                                               | 7            |
| Descriptive data         | 14* | (a) Give characteristics of study participants (eg demographic, clinical, social) and information on exposures and potential confounders<br>(b) Indicate number of participants with missing data for each variable of interest<br>(c) <i>Cohort study</i> —Summarise follow-up time (eg, average and total amount)                                                                                           | 7-8          |
| Outcome data             | 15* | <i>Cohort study</i> —Report numbers of outcome events or summary measures over time<br><i>Case-control study</i> —Report numbers in each exposure category, or summary measures of exposure<br><i>Cross-sectional study</i> —Report numbers of outcome events or summary measures                                                                                                                             | 7-8          |
| Main results             | 16  | (a) Give unadjusted estimates and, if applicable, confounder-adjusted estimates and their precision (eg, 95% confidence interval). Make clear which confounders were adjusted for and why they were included<br>(b) Report category boundaries when continuous variables were categorized<br>(c) If relevant, consider translating estimates of relative risk into absolute risk for a meaningful time period | 8-10<br>8-10 |
| Other analyses           | 17  | Report other analyses done—eg analyses of subgroups and interactions, and sensitivity analyses                                                                                                                                                                                                                                                                                                                |              |
| <b>Discussion</b>        |     |                                                                                                                                                                                                                                                                                                                                                                                                               |              |
| Key results              | 18  | Summarise key results with reference to study objectives                                                                                                                                                                                                                                                                                                                                                      | 11           |
| Limitations              | 19  | Discuss limitations of the study, taking into account sources of potential bias or imprecision. Discuss both direction and magnitude of any potential bias                                                                                                                                                                                                                                                    | 13           |
| Interpretation           | 20  | Give a cautious overall interpretation of results considering objectives, limitations, multiplicity of analyses, results from similar studies, and other relevant evidence                                                                                                                                                                                                                                    | 11-13        |
| Generalisability         | 21  | Discuss the generalisability (external validity) of the study results                                                                                                                                                                                                                                                                                                                                         | 11-13        |
| <b>Other information</b> |     |                                                                                                                                                                                                                                                                                                                                                                                                               |              |
| Funding                  | 22  | Give the source of funding and the role of the funders for the present study and, if applicable, for the original study on which the present article is based                                                                                                                                                                                                                                                 | 3            |

# BMJ Open

## An observational study of the status of coronary risk biomarkers among Negritos with Metabolic Syndrome in East Coast Malaysia.

|                                 |                                                                                                                                                                                                                                                                                                                                                                                                                                                                                                                                                                                                                                                                                                                           |
|---------------------------------|---------------------------------------------------------------------------------------------------------------------------------------------------------------------------------------------------------------------------------------------------------------------------------------------------------------------------------------------------------------------------------------------------------------------------------------------------------------------------------------------------------------------------------------------------------------------------------------------------------------------------------------------------------------------------------------------------------------------------|
| Journal:                        | <i>BMJ Open</i>                                                                                                                                                                                                                                                                                                                                                                                                                                                                                                                                                                                                                                                                                                           |
| Manuscript ID                   | bmjopen-2018-021580.R2                                                                                                                                                                                                                                                                                                                                                                                                                                                                                                                                                                                                                                                                                                    |
| Article Type:                   | Research                                                                                                                                                                                                                                                                                                                                                                                                                                                                                                                                                                                                                                                                                                                  |
| Date Submitted by the Author:   | 02-Oct-2018                                                                                                                                                                                                                                                                                                                                                                                                                                                                                                                                                                                                                                                                                                               |
| Complete List of Authors:       | Mohd Mokhsin, Nurul Atiqah; Universiti Teknologi MARA, Faculty of Medicine<br>Mokhtar, Siti Shuhada; Universiti Teknologi MARA, Faculty of Medicine<br>Mohd Ismail, Aletza; Universiti Teknologi MARA, Faculty of Medicine<br>M. Nor, Fadzilah; Universiti Teknologi MARA, Faculty of Medicine<br>Shaari, Syahrul Azlin; Universiti Teknologi MARA, Faculty of Medicine<br>Nawawi, Hapizah; Universiti Teknologi MARA, Institute of Pathology, Forensic and Laboratory Medicine (I-PPerForM)<br>Yusoff, Khalid; UCSI University, Faculty of Medicine and Health Sciences<br>Rahman, Thuhairah; Universiti Teknologi MARA, Faculty of Medicine<br>Hoh, Boon Peng; UCSI University, Faculty of Medicine and Health Sciences |
| <b>Primary Subject Heading</b>: | Pathology                                                                                                                                                                                                                                                                                                                                                                                                                                                                                                                                                                                                                                                                                                                 |
| Secondary Subject Heading:      | Diabetes and endocrinology, Epidemiology, Public health                                                                                                                                                                                                                                                                                                                                                                                                                                                                                                                                                                                                                                                                   |
| Keywords:                       | Lipid disorders < DIABETES & ENDOCRINOLOGY, Hypertension < CARDIOLOGY, EPIDEMIOLOGY                                                                                                                                                                                                                                                                                                                                                                                                                                                                                                                                                                                                                                       |
|                                 |                                                                                                                                                                                                                                                                                                                                                                                                                                                                                                                                                                                                                                                                                                                           |

SCHOLARONE™  
Manuscripts

# **An observational study of the status of coronary risk biomarkers among Negritos with Metabolic Syndrome in East Coast Malaysia.**

**Atiqah Mokhsin<sup>1</sup>, Siti Shuhada Mokhtar<sup>1</sup>, Aletza Mohd. Ismail<sup>1</sup>, Fadzilah M. Nor<sup>1</sup>, Syahrul Azlin Shaari<sup>1</sup>, Hapizah Nawawi<sup>2</sup>, Khalid Yusoff<sup>3</sup>, Thuhairah Abdul Rahman<sup>1</sup>, Boon Peng Hoh<sup>3</sup>**

<sup>1</sup>Faculty of Medicine, Universiti Teknologi MARA, 47000 Sungai Buloh, Selangor, Malaysia

<sup>2</sup>Institute of Pathology, Forensic and Laboratory Medicine (I-PPerForM), Universiti Teknologi MARA, 47000 Sungai Buloh, Selangor, Malaysia

<sup>3</sup>Faculty of Medicine and Health Sciences, UCSI University, Jalan Menara Gading, Taman Connaught 56000 Kuala Lumpur, Wilayah Persekutuan Kuala Lumpur, Malaysia

## Correspondence:

1) Thuhairah Hasrah Abdul Rahman (Assigned corresponding author)

Faculty of Medicine, Universiti Teknologi MARA, Jalan Hospital, 47000 Sungai Buloh, Selangor

Tel : +603-61267637

Fax : +603-61265212

tootie74@yahoo.com

2) Hoh Boon Peng

Faculty of Medicine and Health Sciences, Jalan Menara Gading, Taman Connaught, 56000 Kuala Lumpur, Wilayah Persekutuan Kuala Lumpur, Malaysia

Tel: +603-91018880 (ext 3725)

Fax: +603-91023606

hohbp@ucsiuniversity.edu.my; hoh.boonpeng@gmail.com

Word count: 3,885 words

## ABSTRACT

**Objectives:** To determine the prevalence of Metabolic Syndrome (MS), ascertain the status of coronary risk biomarkers and establish the independent predictors of these biomarkers among the Negritos.

**Settings:** Health screening programme conducted in three inland settlements in East Coast Malaysia and Peninsular Malaysia.

**Subjects:** Hundred and fifty (150) Negritos who were still living in three inland settlements in East Coast Malaysia and 1,227 Malays in Peninsular Malaysia. These subjects were then categorized into MS and Non-MS groups based on the IDF consensus worldwide definition of MS and were recruited between 2010 and 2015. The subjects were random and on voluntary basis.

**Primary and secondary outcome measures:** This study was a cross sectional study. Serum samples were collected for analysis of inflammatory (hsCRP), endothelial activation (sICAM-1) and prothrombogenesis [Lp(a)] biomarkers.

**Results:** MS was significantly higher among the Malays compared to Negritos (27.7% vs 12.0%). Amongst the Malays, MS subjects had higher hsCRP ( $p=0.01$ ) and sICAM-1 ( $p<0.05$ ) than their non-MS counterpart. There were no significant differences in all the biomarkers between MS and the non-MS Negritos. However, when compared between ethnicity, all biomarkers were higher in Negritos compared to Malays ( $p<0.001$ ). Binary logistic regression analysis affirmed that Negritos were an independent predictor for Lp(a) concentration ( $p<0.001$ ).

**Conclusions:** This study suggests that there may possibly be a genetic influence other than lifestyle which could explain the lack of difference in biomarkers concentration between MS and non-MS Negritos and for Negritos predicting Lp(a).

**Keywords:** Orang Asli; Aborigines; Coronary Artery Disease; Hypertension; Hypercholesterolaemia; Lp(a)

## ARTICLE SUMMARY

### Strengths and limitations of this study

1. This study gains access to the earliest and smallest population of the Malaysian aboriginal tribe, the inland dwelling Negrito, whom have completely isolated themselves from influences of modernization.
2. This is one of the first study that assessed biomarkers of atherogenesis among the inland dwelling Negritos other than hsCRP.
3. This is one of the first study to determine the independent predictors of the atherogenesis biomarkers among inland dwelling Negritos.
4. The small sample size of Negritos due to difficulties accessing remote tribes and small total population poses a limitation despite achieving a minimum sample size requirement.

### Ethics

Consent from the Department of Orang Asli Development (JAKOA) [JHEOA,PP.30.042.JId5(17)] and Institutional ethics approval granted by Universiti Teknologi MARA (UiTM) [600-RMI(5/1/6)] were obtained prior to the initiation of this study. All methods were carried out in accordance with relevant guidelines and regulations. Written, informed consent was obtained from all subjects aged 18 years-old and above, prior to recruitment. Communications were done in Bahasa

1  
2  
3 Malaysia with some input from local translators, either JAKOA officers or tribal leaders if and  
4 when required.  
5  
6

### 7 **Funding**

- 8  
9 1) The Ministry of Higher Education Malaysia under Fundamental Research Grant Scheme  
10 [Grant code: 600-RMI/FRGS 5/3 (136/2014)]  
11 2) The Ministry of Higher Education Malaysia under Long Term Research Grant Scheme  
12 [Grant code: 600-RMI/LRGS 5/3 (2/2011)-2]  
13

14 The funders had no role in the study design, data collection, data analysis, decision to publish, or  
15 preparation of the manuscript.  
16

### 17 **Competing Financial Interests**

18  
19 The author(s) declare no competing financial interests.  
20  
21

### 22 **Data Sharing**

23  
24 No additional data available.  
25  
26  
27  
28  
29  
30  
31  
32  
33  
34  
35  
36  
37  
38  
39  
40  
41  
42  
43  
44  
45  
46  
47  
48  
49  
50  
51  
52  
53  
54  
55  
56  
57  
58  
59  
60

## INTRODUCTION

*Orang Asli* (OA) are the indigenous people believed to be the earliest inhabitants of Peninsular Malaysia. There are 18 OA tribes, categorized under three main groups according to their different languages and customs: Negritos, located in the Northern part of the peninsula; Senoi, residing in the Central Region and Proto-Malays (or Aboriginal Malay), in the Southern Region. The OA constitutes approximately 0.5% (150,000) of the total Malaysian population with Senoi representing the largest OA population (54%) followed by Proto Malays (43%), and Negritos (3%) [1].

Negrito, known to be the earliest OA tribe to arrive in Peninsular Malaysia, is believed to have occupied this region of Malaysia approximately 25,000 years ago [2]. A substantial group of the Negritos continue to practice nomadic lifestyle for reasons such as illness, food resources and intra-tribal feuds.

The poverty rate among OA is 76.9% with the majority of OA living in the jungles or rural areas, while a minority have moved into urban areas [3]. Although, the Malaysian Government has taken measures to eradicate the poverty level among the OAs which subsequently led to the reduction of poverty-associated diseases such as malaria, tuberculosis, AIDS and dental decay [3], to name a few; disorders such as metabolic syndrome (MS) and coronary artery disease (CAD) are not well addressed. This could most likely stem from the common misconception that these are 'diseases of the rich', when in fact, it is not exclusive to one type of socioeconomic group but transcends all walks of life [4,5].

MS, a major public health challenge, is a cluster of metabolic disturbances which result from a complex interaction between genetic and environmental factors [6]. MS is associated with increased risk of CAD [7]. The metabolic abnormalities that underlie the definition of MS include insulin resistance, central obesity, dyslipidaemia, hypertension and glucose intolerance [8]. The prevalence of MS among Malaysians was estimated between 37.1%-42.5% in 2008 [9].

It has also been well established that MS is associated with enhanced inflammation, endothelial activation and prothrombogenesis that are the key processes in atherosclerosis. Previous studies have documented the association between MS and enhanced inflammation [10]. Increases in proinflammatory cytokines such as interleukin-6 (IL-6), resistin and C-reactive protein (CRP) are due to the overproduction by monocyte-derived macrophages residing in the expanded adipose tissue mass [11]. The NCEP-ATP reported higher soluble endothelial adhesion molecules such as intercellular adhesion molecule-1 (ICAM-1), vascular adhesion molecule-1 (VCAM-1) and E-selectin among subjects with MS [12]. Furthermore, various studies have also shown elevated lipoprotein (a) [Lp(a)] in MS subjects [13]. Lp(a) has been found to significantly reduce endogenous clot lysis in plasma *ex vivo* [14], possibly to its binding to fibrinogen and attenuating fibrin-mediated enhancement of tissue plasminogen activator of plasminogen [15].

Despite MS becoming a major public health concern with extensive data on this syndrome worldwide, reports on its prevalence in Malaysia remain scarce, particularly so among the OA in the country. There have been previous studies addressing factors related to MS globally in Malaysia [16], however, the samples used in these studies were

1  
2  
3 not a representative of the Malaysian population as they focused on the major ethnicities  
4 in Malaysia – Malay, Chinese and Indian, while the OA population was poorly  
5 represented.  
6

7 To the best of our knowledge, there is only one recent published study that reported the  
8 urbanized Orang Seletar (a Proto-Malay subtribe) having the highest prevalence for  
9 central obesity ( $66.1\pm 5.9\%$ ) compared to the other subtribes who are less urbanized  
10 (Senoi and Negrito). The study also revealed that the prevalence for hypertension was  
11 highest among the Negritos ( $43.8\pm 9.3\%$  and  $51.2\pm 15.3\%$ ) who resided in most remote  
12 areas and were the leanest among the six OA subtribes investigated [1].  
13

14 The lack of data on the prevalence of MS among OA specifically the Negritos, could  
15 most likely stem from the preconceived notion that they are not susceptible to the  
16 disorder due to their detachment from urbanization and their healthier lifestyle.  
17 Furthermore, there have been very few studies investigating the status of the biomarkers  
18 reflecting inflammation, endothelial activation and prothrombogenesis among the  
19 Negritos with MS. In addition, determining the MS components among them will further  
20 identify potential modifiable coronary risks such as hypertension, smoking, dyslipidaemia  
21 and glucose intolerance through proper education and healthcare services.  
22  
23

24 Therefore, this study aims to determine the MS components among Negrito, identify  
25 their status of inflammation, endothelial activation and prothrombogenesis and ascertain  
26 the independent predictors for these biomarkers of coronary risk.  
27  
28

## 29 **SUBJECTS AND METHODS**

### 30 **Target population and sample collection**

31  
32 One hundred and fifty Negrito subjects were recruited in this cross-sectional study. They  
33 were from Bateq and Mendriq sub-tribes, from three inland settlements in Gua Musang,  
34 Kelantan, East Coast of Peninsular Malaysia ( $4.8843^{\circ}\text{N}$ ,  $101.9682^{\circ}\text{E}$ ). 1,177 Malays  
35 were also recruited from various national health screening programmes in Peninsular  
36 Malaysia. The subjects collected were randomly selected and on a voluntary basis.  
37 These subjects were then categorized into Metabolic Syndrome (MS) and Non-Metabolic  
38 Syndrome (Non-MS) groups based on the IDF consensus worldwide definition of MS  
39 [17]. All methods were carried out in accordance with relevant guidelines and  
40 regulations.  
41  
42  
43

44 The sample size was calculated using PS Power and Sample Size Calculations version  
45 3.0 [18] with a power of study at 99% and prevalence of MS among Negritos and Malays  
46 at  $15.2\pm 5\%$  [19] and  $38.8\pm 5\%$  [20] respectively. The minimum sample size  
47 calculated for Negritos and Malays are both 125. Due to the significant sample size  
48 difference between the two ethnic groups recruited and the relative difficulty in accessing  
49 the Negrito's remote locations of habitat, it is relevant to highlight that this study  
50 conducted a within-ethnic group rather than a between-group comparison of the  
51 biomarkers of interest when subdivided between MS and non-MS.  
52  
53

54 Demographic data was gathered by interview questionnaire. Information such as age,  
55 gender, tribe, education and occupation, health-related questions such as subjects' past  
56  
57

1  
2  
3 medical history, social history including smoking status were recorded. Family history of  
4 cardiometabolic and infectious diseases were also recorded.  
5

6 Topography measurements included blood pressure (BP), body mass index (BMI), waist  
7 circumference (WC) and waist-to-hip ratio (WHR). With the subject in a seated position  
8 and following 5-10 minutes of rest, BP was measured by an automated BP reader (cuff  
9 size 12 x 33cm, Colin press-mate, Japan). The systolic BP (SBP) and diastolic BP (DBP)  
10 were measured to the nearest 1mmHg. BMI was calculated using the formula:  
11  $BMI = \text{weight}(\text{kg}) / \text{height}^2(\text{m}^2)$ . WC was measured to the nearest 0.5cm using a measuring  
12 tape at midway between the inferior margin of the last rib and the iliac crest in a  
13 horizontal plane. Hip circumference measurement was taken around the pelvis at the  
14 point of maximal protrusion of the buttocks. Any visible stigmata of dyslipidaemia and  
15 diabetes mellitus (DM) were documented.  
16  
17  
18  
19

## 20 **Defining MS (IDF Criteria, 2006)**

  
21

22 An individual was classified as having MS if central obesity was exhibited along with at  
23 least two of the following: (1) elevated triglyceride (TG) concentration of >1.7mmol/L, (2)  
24 reduced high-density lipoprotein cholesterol (HDL-c) of <1.0 or 1.3mmol/L in male and  
25 female respectively, (3) elevated BP of >140/90mmHg, and a raised fasting plasma  
26 glucose (FPG) of  $\geq 5.6$ mmol/L. Central obesity, using the suggested WC for Asian/South  
27 Asians, was defined as  $\geq 90$ cm and  $\geq 80$ cm for males and females respectively [17].  
28  
29

## 30 **Venous blood sampling and on-site biochemical analysis**

  
31

32 Venous blood samples were collected following a non-traumatic venepuncture between  
33 0800h and 1500h. Serum and plasma were separated by centrifugation at 3500rpm for  
34 10 minutes within 1 hour and stored at -20°C before analyse.  
35  
36  
37

## 38 **Biochemical Analysis**

  
39

40 Serum samples were sent to Centre for Pathology Diagnostic & Research Laboratories  
41 (CPDRL) of Faculty of Medicine, Universiti Teknologi MARA, Selangor, Malaysia. All  
42 clinical chemistry tests analyzed were MS ISO 15189:2014 accredited.  
43

44 Cardiometabolic parameters tested were fasting serum lipids (FSL) including total  
45 cholesterol (TC), TG and HDL-c which were measured by enzymatic reference methods.  
46 Plasma glucose was analyzed by hexokinase method. All methods were run on an  
47 automated analyzer (Cobas Integra 400 PLUS, Roche Diagnostic, Germany) except for  
48 low density lipoprotein cholesterol (LDL-c) concentration which was derived using the  
49 Friedewald equation [21].  
50  
51

## 52 **Analyses of Biomarkers of inflammation, endothelial activation and** 53 **prothrombogenesis** 54 55 56 57



The biomarkers analyzed included hsCRP, sICAM-1 and Lp(a). Both hsCRP and Lp(a) were measured using turbidimetric method on an automated analyser (Cobas Integra 400 PLUS, Roche Diagnostics, Germany). Serum s-ICAM-1 concentration was determined by enzyme linked immunosorbent assay (ELISA) based on the measured optical density (eBioscience Bender MedSystems, Vienna Austria).

## Data Analysis

The associations of all three biomarkers were compared between two groups of MS and non-MS, using independent T-test, SPSS version 20. Binary logistic regression was performed on the independent variables (coronary risk biomarkers) to assess their impact on the likelihood that subjects would fall into each of the MS component (obesity, hypertension, DM, and low HDL-c or high TG concentrations). The specific model estimated from the data was:

$\text{logit}(\text{coronary risk biomarkers}) = \alpha + b_1(\text{age}) + b_2(\text{ethnicity}) + b_3(\text{gender}) + b_4(\text{smoking status}) + b_5(\text{BMI}) + b_6(\text{WC}) + b_7(\text{SBP}) + b_8(\text{DBP}) + b_9(\text{glucose concentration}) + b_{10}(\text{HDL-c concentration}) + b_{11}(\text{TG concentration})$ , where the dependent variable is logit coronary risk biomarkers,  $\alpha$  is the estimate for the intercept and  $b_1, b_2, \dots, b_{11}$  are estimates for the coefficients of the 11 predictors.

The variables were represented by two dummy variables to reflect the number of responses and reference categories. They were: ethnicity = Malay (1), Negrito (0), Negrito = reference group; gender, female (1), male (0) = reference group; smoking status, smoking (1) and not smoking (0) = reference group; While for age, BMI, WC, SBP, DBP, glucose, HDL-c and TG concentrations were continuous variables.

## Patient and Public Involvement

Patients were not involved in the recruitment or conduct of the study. Written, informed consent was obtained from all subjects aged 18 years-old and above, prior to recruitment. Communications were done in Bahasa Malaysia with some input from local translators, either the JAKOA officers or tribal leaders if and when required. The results of this study were disseminated to subjects through the JAKOA officers or using the postal address if provided. A physician was placed in the settings during the health screening programmes to provide an advice or referral letter when necessary.

## RESULTS

### Demographic Data

Table 1 summarizes the demographic parameters for the Malays and Negritos. A total of 326 Malays (27.7%) and 18 Negritos (12.0%) were diagnosed with MS based on the IDF 2006 criteria. On a separate note, 15.5% Malays were diabetic while 1.5% of the Negritos had IFG  $\geq 5.6$ mmol/L or random plasma glucose of  $>11.0$ mmol/L. We observed that 43.9% of the Malays and 57.2% of the Negritos were hypertensive while 58.7% Malays and 14.0% Negritos had central obesity.

1  
2  
3 Compared to the Non-MS Negritos, their MS counterpart had higher TC ( $5.30\pm 1.05$  vs  
4  $4.48\pm 0.85$ mmol/L,  $p<0.001$  respectively), TG ( $2.14\pm 0.79$  vs  $1.41\pm 0.68$ mmol/L,  $p<0.001$   
5 respectively) and LDL-c ( $3.36\pm 0.69$  vs  $2.80\pm 0.84$ mmol/L,  $p=0.008$  respectively). The  
6 most frequent criteria diagnosing MS among the Negritos were hypertension, elevated  
7 TG and low HDL-c and none of the Negritos diagnosed with MS had any form of glucose  
8 intolerance.  
9

10  
11  
12  
13  
14  
15  
16  
17  
18  
19  
20  
21  
22  
23  
24  
25  
26  
27  
28  
29  
30  
31  
32  
33  
34  
35  
36  
37  
38  
39  
40  
41  
42  
43  
44  
45  
46  
47  
48  
49  
50  
51  
52  
53  
54  
55  
56  
57  
58  
59  
60

For peer review only

**Table 1: Demographic and clinical characteristics of the Negritos and Malays**

| Parameters                                 | Malays<br>(n = 1,177) |                   |         | Negrito<br>(n = 150) |                   |         |
|--------------------------------------------|-----------------------|-------------------|---------|----------------------|-------------------|---------|
|                                            | MS<br>(n=326)         | Non-MS<br>(n=851) | p value | MS<br>(n=18)         | Non-MS<br>(n=132) | p value |
| <sup>b</sup> Age (Years)                   | 49.53±11.77           | 40.00±14.69       | <0.001  | 30.56±11.11          | 31.29±11.00       | NS      |
| <sup>a</sup> Gender<br>(Males/Females)     | 45.1/54.9             | 37.3/62.7         | 0.02    | 5.6/94.4             | 59.1/40.9         | <0.001  |
| <sup>a</sup> Diabetes                      | 42.1                  | 5.6               | <0.001  | 0.00                 | 1.8               | NS      |
| <sup>b</sup> Plasma glucose<br>(mmol/L)    | 8.22±4.38             | 5.88±2.33         | <0.001  | 5.18±1.26            | 4.61±1.41         | NS      |
| <sup>a</sup> Hypertension                  | 83.2                  | 28.9              | <0.001  | 83.3                 | 53.5              | 0.02    |
| <sup>b</sup> SBP (mmHg)                    | 138.22±17.82          | 120.99±17.86      | <0.001  | 133.44±23.06         | 130.25±17.22      | NS      |
| <sup>b</sup> DBP (mmHg)                    | 83.49±10.63           | 73.69±11.42       | <0.001  | 81.39±12.87          | 81.09±13.41       | NS      |
| <sup>a</sup> Central Obesity               | 100                   | 42.9              | <0.001  | 100                  | 2.3               | <0.001  |
| <sup>b</sup> Waist<br>circumference (cm)   | 97.19±8.93            | 82.75±11.24       | <0.001  | 90.81±6.88           | 69.01±15.35       | <0.001  |
| <sup>b</sup> BMI (kg/m <sup>2</sup> )      | 30.57±4.90            | 24.94±4.77        | <0.001  | 26.31±3.26           | 19.75±2.55        | <0.001  |
| <sup>a</sup> Current smoker                | 16.9                  | 13.2              | NS      | 23.5                 | 46.8              | NS      |
| <sup>b</sup> Total cholesterol<br>(mmol/L) | 5.38±1.00             | 5.05±0.96         | <0.001  | 5.30±1.05            | 4.48±0.85         | <0.001  |
| <sup>b</sup> Triglyceride<br>(mmol/L)      | 2.70±1.54             | 1.41±0.82         | <0.001  | 2.14±0.79            | 1.41±0.68         | <0.001  |
| <sup>b</sup> LDL-c (mmol/L)                | 3.10±0.76             | 2.99±0.76         | 0.03    | 3.36±0.69            | 2.80±0.84         | 0.008   |
| <sup>b</sup> HDL-c (mmol/L)                | 1.08±0.31             | 1.42±0.37         | <0.001  | 0.98±0.38            | 1.01±0.28         | NS      |

**Notes:** <sup>a</sup> Data expressed as percentage; <sup>b</sup> Data expressed as Mean±SD

**Abbreviations:** SBP, systolic blood pressure; DBP, diastolic blood pressure; BMI, Body mass index; NS, not significant

## Comparison of the biomarkers of inflammation, endothelial activation and prothrombogenesis in Malay and Negrito subjects (Table 2)

There was no significant differences between MS and non-MS among Negritos for all biomarkers ( $p > 0.05$ ) whereas MS Malays illustrated higher hsCRP (mean $\pm$ SD=1.88 $\pm$ 1.16 vs 1.26 $\pm$ 1.13mg/L,  $p < 0.001$  respectively) and sICAM-1 (mean $\pm$ SD=531.73 $\pm$ 185.73 vs 465.46 $\pm$ 202.08ng/mL,  $p < 0.001$  respectively) concentrations compared to their Non-MS counterpart. When comparing between Negritos and Malays, Negritos showed significantly higher concentrations of hsCRP (mean $\pm$ SD=2.27 $\pm$ 2.25 vs 1.41 $\pm$ 1.17mg/L,  $p < 0.001$  respectively), sICAM-1 (mean $\pm$ SD=684.85 $\pm$ 388.03 vs 482.25 $\pm$ 200.05ng/mL,  $p < 0.001$  respectively) and Lp(a) (mean $\pm$ SD=0.22 $\pm$ 0.22 vs 0.06 $\pm$ 0.04mg/L,  $p < 0.001$  respectively) compared to the Malays.

**Table 2: Concentrations of inflammatory, endothelial activation and prothrombogenesis biomarkers in MS and non-MS Malays and Negritos**

| Biomarkers         | Malays<br>(n = 1,177) |                     |            | Negrito<br>(n = 150) |                     |            |
|--------------------|-----------------------|---------------------|------------|----------------------|---------------------|------------|
|                    | MS<br>(n=326)         | Non-MS<br>(n=851)   | p<br>value | MS<br>(n=18)         | Non-MS<br>(n=132)   | p<br>value |
| hsCRP<br>(mg/L)    | 1.88 $\pm$ 1.16       | 1.26 $\pm$ 1.13     | <0.001     | 4.21 $\pm$ 3.20      | 2.06 $\pm$ 2.04     | NS         |
| sICAM-1<br>(ng/mL) | 531.73 $\pm$ 185.76   | 465.46 $\pm$ 202.08 | <0.001     | 670.06 $\pm$ 377.27  | 688.84 $\pm$ 390.97 | NS         |
| Lp(a) (g/L)        | 0.06 $\pm$ 0.04       | 0.06 $\pm$ 0.04     | NS         | 0.23 $\pm$ 0.26      | 0.22 $\pm$ 0.22     | NS         |

**Notes:** Data expressed as Mean  $\pm$  SD

**Abbreviations:** NS, not significant

## Independent predictors of the biomarkers of inflammation, endothelial activation and prothrombogenesis in Malay and Negrito subjects (Table 3)

To further determine the independent predictors of these biomarkers, binary logistic regression analyses were performed with the biomarkers as dependent variables. It was found that BMI ( $p=0.016$ ), FPG ( $p<0.001$ ) and DBP ( $p=0.042$ ) were independent predictors for hsCRP whilst the Negrito determined Lp(a) ( $p<0.001$ ) when taken account all subjects after adjusting for age, gender, DM, hypertension, smoking status and BMI.

Among the Malays, it was found that male ( $p<0.001$ ), BMI ( $p<0.001$ ) and FPG concentration ( $p<0.001$ ) predicted for hsCRP whilst male ( $p=0.040$ ) and FPG ( $p=0.039$ ) predicted Lp(a) after adjusting for the same parameters. There were no independent predictors for any of these biomarkers among Negritos.

**Table 3: Predictors for hsCRP and Lp(a)**

| Groups           | Variables | Independent predictor      | Beta  | Adjusted OR | 95% CI Lower, Upper | p value |
|------------------|-----------|----------------------------|-------|-------------|---------------------|---------|
| (a) All Subjects | hsCRP     | 1) BMI ( $\text{kg/m}^2$ ) | 0.05  | 1.05        | 1.01, 1.10          | 0.016   |
|                  |           | 2) Glucose (mmol/L)        | 0.15  | 1.16        | 1.12, 1.19          | <0.001  |
|                  |           | 3) Diastolic (mmHg)        | 0.01  | 1.01        | 1.00, 1.02          | 0.042   |
|                  | Lp(a)     | 1) Ethnicity (Negrito)     | 1.03  | 2.79        | 1.87, 4.14          | <0.001  |
| (b) Malays       | hsCRP     | 1) Gender (male)           | -0.64 | 0.53        | 0.39, 0.71          | <0.001  |
|                  |           | 2) BMI ( $\text{kg/m}^2$ ) | 0.18  | 1.20        | 1.16, 1.24          | <0.001  |
|                  |           | 3) Glucose (mmol/L)        | 0.08  | 1.08        | 1.04, 1.13          | <0.001  |
|                  | Lp(a)     | 1) Gender (Male)           | -0.56 | 0.57        | 0.39, 0.84          | 0.004   |
|                  |           | 2) Glucose (mmol/L)        | -0.08 | 0.93        | 0.86, 1.00          | 0.039   |

**Notes:** The model reasonably fits well. Model assumptions are met. There are no interaction and multicollinearity problem.

## DISCUSSION

MS is defined by an aggregation of atherosclerotic factors, mainly central obesity, hypertension, glucose intolerance and dyslipidaemia which, in combination, enhance the probability of developing type 2 DM and CAD [22]. In two European studies [23,24], the presence of MS predicted increased CAD mortality. These findings are not unexpected considering MS comprises of established risk factors for CAD such as hypertension, impaired glucose tolerance, low HDL-c concentration, elevated TG concentration and obesity, which enhances endothelial activation and inflammation, key processes in atherogenesis. Furthermore, coronary risk biomarkers are strongly associated with endothelial dysfunction [25] and thrombosis [26] and are elevated in patients with atherosclerosis-related disease such as CAD [27] and peripheral artery disease [28] in previous reports.

There have been several previous reports determining the prevalence of non-communicable diseases (NCD) such as DM, hypertension, dyslipidaemia and obesity among OA subjects. A previous report on the health status of the Negrito subtribe Lanoh showed that 8.9% were recently diagnosed with hypertension, 6.7% had hypertension and DM and an alarming 26.7% had pre-obesity [29]. A larger population study done identified central obesity and hypertension among OA sampled from seven different subtribes and eight settlements [1]. What is more alarming is the report by Aziz et al (2016) which highlighted the higher percentage of OA having high insulin levels, hsCRP and higher percentage categorized as high risk by the Framingham Risk Score which forecasts 10-year risk of CAD [30]. These reports strongly imply that NCDs such as hypertension, dyslipidaemia, central obesity and DM – which are clusters of metabolic factors associated with MS, have gradually led to the increase in CAD risk among OA.

Although several reports highlighted the increasing prevalence of NCDs among the OA in Malaysia, there is scarce research that extended to investigate biomarkers for coronary risk amongst this population. To the best of our knowledge, there is only one other study which reported the status of inflammatory biomarker among OA in Peninsular Malaysia compared to Malays [30]. Our study further explored other biomarkers reflecting atherogenesis such as endothelial activation and prothrombogenesis. This study showed that biomarkers of inflammation (hsCRP) and endothelial activation (sICAM-1) were enhanced in MS Malays compared to their Non-MS counterpart. These findings are expected and in keeping with previous studies denoting the higher CAD risk among MS [17,30]. The association of MS with inflammation and endothelial activation is also well documented [12,31]. The elevated sICAM-1 seen among MS Malays could be attributed to higher prevalence of hypertension, obesity and dyslipidaemia compared to their non-MS counterpart which is parallel with previous reports [31,32].

However, we were unable to observe any statistical difference in the concentrations of biomarkers of inflammation, endothelial activation and prothrombogenesis between MS and non-MS among the Negritos. This contradicts previous reports underscoring enhanced inflammation among OAs [30]. These inconsistent findings could be attributed to the small sample size of Negritos in comparing the biomarkers, although the minimum sample size calculated was achieved. Furthermore, a previous study conducted to determine the prevalence of MS in an OA population found that the prevalence of MS

1  
2  
3 among inland Negritos to be 12.5% which is consistent with our findings of 12% among  
4 our Negrito population [19]. The population differences between the previous study and  
5 ours could also have led to these differences, where we recruited mainly inland Negritos  
6 in the Northern state of Malaysia where majority of them are distributed, while the  
7 previous study recruited OAs from a mixture of inland and peripheries of towns where  
8 urbanization could have influenced lifestyle which could enhance inflammation and  
9 insulin resistance [30].  
10

11 In addition, as a general index of inflammation, CRP concentrations have been shown to  
12 vary by ethnicity and within ethnic groups by fitness, as it was reported to be higher in  
13 healthy Indian Asians than in European white people and were related to greater central  
14 obesity and insulin resistance in Indian Asians [33]. Furthermore, none of the Negritos  
15 diagnosed with MS had any form of glucose intolerance which could possibly explain  
16 these inconsistent findings as there have been reports on the association between CRP  
17 and sICAM-1 with MS, hypertension, and DM [34,35]. It is also worth highlighting that  
18 when comparing these biomarkers between Negritos and Malays, we observed higher  
19 concentrations of all three biomarkers among the younger aged Negrito subjects  
20 compared to the Malays. This suggests that the Negritos may be at higher risk of CAD at  
21 a younger age group hence warrants further investigation.  
22  
23

24 Furthermore, findings from this study suggest that the MS Negritos despite having  
25 coronary risk factor including hypertension and dyslipidaemia, the failure to exhibit  
26 enhanced atherogenesis compared to their non-MS counterpart could possibly be  
27 attributed to genetic and/or lifestyle influences which could play a role in attenuating  
28 atherogenesis. The Negritos included in this study were located in remote areas of  
29 Northern Peninsular Malaysia and to certain extent, still practicing the hunter gatherers  
30 lifestyle, and living isolated from urbanization, thus may have contributed to the  
31 differences observed in the biomarkers between the two ethnicities when comparing with  
32 the MS and non-MS counterparts. This is in keeping with previous studies which  
33 reported improved inflammatory, endothelial activation and prothrombogenesis status in  
34 MS subjects, following aggressive lifestyle modification which included dietary  
35 improvement and initiation and maintenance of exercise [36,37].  
36  
37

38 One possible postulating genetic factor that may contribute to this finding is the genetic  
39 variation of the candidate gene *CDH13*. Recent population genomic studies on the  
40 Negritos have identified a strong and consistent positive natural selection signal  
41 spanning the genomic region which harbours *CDH13* [38,39]. This implies that the  
42 genetic profile of this gene in the Negritos was significantly differentiated from the rest of  
43 the populations. *CDH13* encodes for protein T-Cadherin which belongs to the cadherin  
44 superfamily of the transmembrane proteins that mediate calcium-dependent intercellular  
45 adhesion, is the receptor for the high molecular weight adiponectin expressed in the  
46 vasculature [40] and cardiac myocytes [41]. Genetic variation of this gene has been  
47 shown to influence metabolic outcome and possibly provides atherogenesis resistant  
48 [39,42,43]. Adiponectin plays a crucial role in the metabolic regulation of obesity, insulin  
49 sensitivity and atherosclerosis and several studies have indicated its anti-atherogenic  
50 properties [44]. A recent study reported that minor allele of rs12051272 revealed a  
51 considerable association with a more favourable metabolic profile, including higher  
52 insulin sensitivity, HDL-c, lower DBP, FPG and TG concentrations [42]. Given the  
53 phenotypic observations and the role of this gene, we postulate a plausibility of *CDH13*  
54 regulating the phenotype and could explain the findings observed in our study whereby  
55 despite fulfilling criteria for MS, these Negritos subjects did not exhibit augmented  
56  
57  
58  
59  
60

1  
2  
3 inflammatory or endothelial activation status when compared to their non-MS  
4 counterpart. Future studies exploring expressions of genetic variants of *CDH13* in these  
5 Negritos cohorts could further shed light on influences of this gene on atherogenesis.  
6

7  
8 Regression analysis has shown that the Negritos independently predicts Lp(a) in this  
9 study. This finding implies that despite hunter-gatherers get more exercise, putting them  
10 at a lower risk for heart disease and relatively isolated from modernization, suggests that  
11 serum Lp(a) concentrations are not influenced by diet or lifestyle, but more significantly  
12 by variants in the *LPA* gene. This is in parallel with previous studies that exhibited  
13 significant difference in Lp(a) levels among various populations including Asian Indian,  
14 Chinese, Non-Hispanic and Blacks [45,46]. Studies have demonstrated the presence of  
15 *LPA* gene polymorphisms primarily determining levels of Lp(a), without significant dietary  
16 or environmental effects [47]. Further studies are warranted to identify common  
17 polymorphisms in *LPA* gene among Negritos and other OA tribes which would further  
18 validate these inferences.  
19

20  
21 The main constraint of this study was the small sample size of the Negrito group which  
22 prevented us from comparing between ethnicities. Although the sample size included  
23 was enough to reject the null hypothesis, a larger sample size could provide a better  
24 representation of the Negrito population. However, it should be reiterated that Negrito  
25 represents only 3% of the total OA population in Malaysia and an even smaller  
26 percentage of that embodies the inland dwellers that are not subjected to urbanization.  
27 This along with major physical problems accessing all these remote tribes prevented us  
28 from having a larger sample to analyze.  
29

## 30 31 **CONCLUSION**

32  
33 This study highlights several key findings that provide further insights into the metabolic  
34 differences between the inland-living aboriginal group, Negritos, in Malaysia and  
35 urbanized Malays in Malaysia. Firstly, MS and Non-MS Negritos failed to show  
36 differences in biomarkers of coronary risks as established by previous reports. Although  
37 the small Negrito sample could be a contributor to this observation, genetic or lifestyle  
38 influence cannot be ruled out. This warrants further studies to confirm these  
39 observations and, if replicated, paves way to future research to understand the  
40 mechanism behind this discrepancy. Secondly, Negritos independently predicting serum  
41 Lp(a) concentrations suggests a genetic influence that surpasses any form of impact by  
42 diet and lifestyle which needs further exploration. Therefore, future studies to identify  
43 common variants of *LPA* gene among this group and to extend such research to other  
44 Aborigine tribes would further improve our understanding of interaction between gene  
45 and phenotypic expression of Lp(a).  
46  
47  
48  
49

## 50 51 **ACKNOWLEDGMENTS**

52  
53 The authors would like to express their appreciation to the Centre for Pathology  
54 Diagnostic and Research Laboratories (CPDRL) of Faculty of Medicine, Universiti  
55  
56  
57



Teknologi MARA for providing the facilities to conduct this research and all of the subjects who were voluntarily participate in this study.

## CONTRIBUTORSHIP STATEMENT

A.M collected the subjects, performed the experiments, analyzed the samples and data, prepared the tables, wrote the manuscript and reviewed drafts of the paper.

S.S.M collected the subjects, analyzed the samples and reviewed drafts of the paper.

A.M.I collected the subjects, validated results and reviewed drafts of the paper.

F.M.N, S.A.S collected the subjects and reviewed drafts of the paper.

H.N collected the subjects, contributed reagents and materials and reviewed drafts of the paper.

K.Y. contributed reagents and materials, drafted the manuscript and reviewed the draft of the paper.T.R conceived and designed the experiments, collected the subjects, contributed reagents and materials, wrote the manuscript and reviewed drafts of the paper.

B.P.H conceived and designed the experiments, collected the subjects, validated results, contributed reagents and materials and reviewed drafts of the paper.

## REFERENCES

- 1 Phipps ME, Chan KKL, Naidu R, *et al.* Cardio-metabolic health risks in indigenous populations of Southeast Asia and the influence of urbanization. *BMC Public Health* 2015;**15**:1–8. doi:10.1186/s12889-015-1384-3
- 2 Masron T, Masami F, Ismail N. Orang Asli in Peninsular Malaysia: Population, Spatial Distribution and Socio-Economic Condition. *J Ritsumeikan Soc Sci Humanit* 2013;**6**:75–115.
- 3 Lim YAL, Romano N, Colin N, *et al.* Intestinal parasitic infections amongst orang asli (indigenous) in malaysia: Has socioeconomic development alleviated the problem? *Trop Biomed* 2009;**26**:110–22.
- 4 Weng X, Liu Y, Ma J, *et al.* An urban–rural comparison of the prevalence of the metabolic syndrome in Eastern China. *Public Health Nutr* 2007;**10**:131–6. doi:10.1017/S1368980007226023
- 5 Prabhakaran D, Chaturvedi V, Shah P, *et al.* Differences in the prevalence of metabolic syndrome in urban and rural India: a problem of urbanization. *Chronic Illn* 2007;**3**:8–19. doi:10.1177/1742395307079197
- 6 Ordovas JM. Genetic links between diabetes mellitus and coronary atherosclerosis. *Curr Atheroscler Rep* 2007;**9**:204–10.
- 7 Zambon A, Pauletto P, Crepaldi G. Review article: the metabolic syndrome - a chronic cardiovascular inflammatory condition. *Aliment Pharmacol Ther* 2005;**22**:20–3. doi:10.1111/j.1365-2036.2005.02589.x
- 8 Eckel RH, Grundy SM, Zimmet PZ. The metabolic syndrome. *Lancet* 2005;**365**:1415–28. doi:10.1016/S0140-6736(09)61794-3
- 9 Mohamud WNW, Ismail A al S, Khir ASM, *et al.* Prevalence of metabolic syndrome and its risk factors in adult Malaysians: Results of a nationwide survey. *Diabetes Res Clin Pract* 2012;**96**:91–7. doi:10.1016/j.diabres.2011.11.020
- 10 Fuentes E, Fuentes F, Vilahur G, *et al.* Mechanisms of chronic state of inflammation as mediators that link obese adipose tissue and metabolic

- 1  
2  
3 syndrome. *Mediators Inflamm* 2013;**2013**:136584. doi:10.1155/2013/136584
- 4 11 Weisberg SP, McCann D, Desai M, *et al.* Obesity is associated with macrophage  
5 accumulation in adipose tissue. *J Clin Invest* 2003;**112**:1796–808.  
6 doi:10.1172/JCI200319246
- 7 12 Mottillo S, Filion KB, Genest J, *et al.* The metabolic syndrome and cardiovascular  
8 risk: A systematic review and meta-analysis. *J Am Coll Cardiol* 2010;**56**:1113–32.  
9 doi:10.1016/j.jacc.2010.05.034
- 10 13 Bermúdez V, Rojas J, Salazar J, *et al.* Variations of Lipoprotein ( a ) Levels in the  
11 Metabolic Syndrome: A Report from the Maracaibo City Metabolic Syndrome  
12 Prevalence Study. 2013;**2013**.
- 13 14 Loscalzo J. Review Lipoprotein(a): A unique risk factor for atherothrombotic  
14 disease. *Arterioscler Thromb Vasc Biol* 1993;**10**:672–9.  
15 doi:\url{10.1161/01.ATV.10.5.672}
- 16 15 Loscalzo J, Weinfeld M, Fless GM, *et al.* Lipoprotein(a), fibrin binding, and  
17 plasminogen activation. *Arterioscler Thromb Vasc Biol* 1990;**10**:240–  
18 5.<http://atvb.ahajournals.org/content/10/2/240?download=true> (accessed 8 Apr  
19 2017).
- 20 16 Ghee LK, Kooi CW. A review of metabolic syndrome research in Malaysia. *Med J  
21 Malaysia* 2016;**71**:20–8.
- 22 17 Alberti SG, Zimmet P, Shaw J, *et al.* The IDF Consensus Worldwide Definition of  
23 the Metabolic Syndrom. 2006.  
24 [https://www.idf.org/webdata/docs/IDF\\_Meta\\_def\\_final.pdf](https://www.idf.org/webdata/docs/IDF_Meta_def_final.pdf)
- 25 18 Dupont WD, Plummer WD. Power and sample size calculations. *Control Clin  
26 Trials* 1990;**11**:116–28. doi:10.1016/0197-2456(90)90005-M
- 27 19 Ashari LS, Mitra AK, Rahman TA, *et al.* Prevalence and risk factors of metabolic  
28 syndrome among an endangered tribal population in Malaysia using harmonized  
29 IDF criteria. *Int J Diabetes Dev Ctries* 2016;**36**:352–8. doi:10.1007/s13410-016-  
30 0487-4
- 31 20 Mohamud WNW, Ismail A al-S, Khir ASM, *et al.* Prevalence of metabolic  
32 syndrome and its risk factors in adult Malaysians: results of a nationwide survey.  
33 *Diabetes Res Clin Pract* 2011;**91**:91–7. doi:10.1016/j.diabres.2011.11.020
- 34 21 Friedewald WT, Levy RI, Fredrickson DS. Estimation of the concentration of low-  
35 density lipoprotein cholesterol in plasma, without use of the preparative  
36 ultracentrifuge. *Clin Chem* 1972;**18**:499–502. doi:10.1177/107424840501000106
- 37 22 Alberti KGMM, Eckel RH, Grundy SM, *et al.* Harmonizing the metabolic syndrome:  
38 A joint interim statement of the international diabetes federation task force on  
39 epidemiology and prevention; National heart, lung, and blood institute; American  
40 heart association; World heart federation; International . *Circulation*  
41 2009;**120**:1640–5. doi:10.1161/CIRCULATIONAHA.109.192644
- 42 23 Isomaa B, Almgren P, Tuomi T, *et al.* Cardiovascular morbidity and mortality  
43 associated with the metabolic syndrome. *Diabetes Care* 2001;**24**:683–9.  
44 doi:10.2337/diacare.24.4.683
- 45 24 Lakka H, Laaksonen DE, Lakka TA. The Metabolic Syndrome and Total and  
46 Cardiovascular Disease Mortality in Middle-aged Men. 2010;**288**:2709–16.  
47 doi:10.1001/jama.288.21.2709
- 48 25 Odegaard AO, Jacobs DR, Sanchez OA, *et al.* Oxidative stress, inflammation,  
49 endothelial dysfunction and incidence of type 2 diabetes. *Cardiovasc Diabetol*  
50 2016;**15**:51. doi:10.1186/s12933-016-0369-6
- 51 26 Tuttolomondo A, Pecoraro R, Casuccio A, *et al.* Peripheral frequency of CD4+  
52 CD28-cells in acute ischemic stroke relationship with stroke subtype and severity  
53 markers. *Med (United States)* 2015;**94**:1–8. doi:10.1097/MD.0000000000000813
- 54  
55  
56  
57  
58  
59  
60

- 1  
2  
3 27 Subirana I, Fitó M, Diaz O, *et al.* Prediction of coronary disease incidence by  
4 biomarkers of inflammation, oxidation, and metabolism. *Sci Rep* 2018;**8**:3191.  
5 doi:10.1038/s41598-018-21482-y
- 6 28 Signorelli SS, Anzaldi M, Libra M, *et al.* Plasma Levels of Inflammatory  
7 Biomarkers in Peripheral Arterial Disease. *Angiology* 2016;**67**:870–4.  
8 doi:10.1177/0003319716633339
- 9 29 Cheng YX, Chong CP, Kiew CF, *et al.* An assessment of health and social-  
10 economic status among Lanoh ethnic sub-group of Orang Asli (indigenous  
11 peoples) in Air Bah I village, state of Perak, Malaysia. *J Appl Pharm Sci*  
12 2014;**4**:32–7. doi:10.7324/JAPS.2014.40106
- 13 30 Tuan Abdul Aziz TA, Teh LK, Md Idris MH, *et al.* Increased risks of cardiovascular  
14 diseases and insulin resistance among the Orang Asli in Peninsular Malaysia.  
15 *BMC Public Health* 2016;**16**:284. doi:10.1186/s12889-016-2848-9
- 16 31 Weiss TW, Arnesen H, Seljeflot I. Components of the Interleukin-6 transsignalling  
17 system are associated with the metabolic syndrome, endothelial dysfunction and  
18 arterial stiffness. *Metabolism* 2013;**62**:1008–13.  
19 doi:10.1016/j.metabol.2013.01.019
- 20 32 Brake DK, Smith EO, Mersmann H, *et al.* ICAM-1 expression in adipose tissue:  
21 effects of diet-induced obesity in mice 3. *Am J Physiol Cell Physiol*  
22 2006;**291**:C1232–9. doi:10.1152/ajpcell.00008.2006.
- 23 33 Tang L, Peng H, Xu T, *et al.* Association of Biomarkers of Inflammation with  
24 Dyslipidemia and Its Components among Mongolians in China. *PLoS One*  
25 2014;**9**:e89023. doi:10.1371/journal.pone.0089023
- 26 34 Mazidi M, Toth PP, Banach M. C-reactive Protein Is Associated With Prevalence  
27 of the Metabolic Syndrome, Hypertension, and Diabetes Mellitus in US Adults.  
28 *Angiology* 2018;**69**:438–42. doi:10.1177/0003319717729288
- 29 35 Ferreira I, Hovind P, Schalkwijk CG, *et al.* Biomarkers of inflammation and  
30 endothelial dysfunction as predictors of pulse pressure and incident hypertension  
31 in type 1 diabetes: a 20 year life-course study in an inception cohort. *Diabetologia*  
32 2018;**61**:231–41. doi:10.1007/s00125-017-4470-5
- 33 36 Antonio F, Fonseca H, Cristina De Oliveira Izar M. High-Sensitivity C-Reactive  
34 Protein and Cardiovascular Disease Across Countries and Ethnicities. *Clinics*  
35 2016;**71**:235–42. doi:10.6061/clinics/2016(04)11
- 36 37 Tuttolomondo A, Di Raimondo D, Pecoraro R, *et al.* Atherosclerosis as an  
37 inflammatory disease. *Curr Pharm Des* 2012;**18**:4266–88.
- 38 38 Deng L, Hoh BP, Lu D, *et al.* The population genomic landscape of human genetic  
39 structure, admixture history and local adaptation in Peninsular Malaysia. *Hum*  
40 *Genet* 2014;**133**:1169–85. doi:10.1007/s00439-014-1459-8
- 41 39 Liu X, Yunus Y, Lu D, *et al.* Differential positive selection of malaria resistance  
42 genes in three indigenous populations of Peninsular Malaysia. *Hum Genet*  
43 2015;**134**:375–92. doi:10.1007/s00439-014-1525-2
- 44 40 W. Hebbard L, Garlatti M, J.T. Young L, *et al.* T-cadherin Supports Angiogenesis  
45 and Adiponectin Association with the Vasculature in a Mouse Mammary Tumor  
46 Model. *Cancer Res* 2008;**65**:1407–16.
- 47 41 Denzel MS, Scimia M, Zumstein PM, *et al.* T-cadherin is critical for adiponectin-  
48 mediated cardioprotection in mice. *J Clin Invest* 2010;**120**:4342–52.  
49 doi:10.1172/JCI43464DS1
- 50 42 Teng MS, Hsu LA, Wu S, *et al.* Association of CDH13 genotypes/haplotypes with  
51 circulating adiponectin levels, metabolic syndrome, and related metabolic  
52 phenotypes: The role of the suppression effect. *PLoS One* 2015;**10**:1–13.  
53 doi:10.1371/journal.pone.0122664
- 54  
55  
56  
57  
58  
59  
60

- 1  
2  
3 43 Gao H, Kim YM, Chen P, *et al*. Genetic variation in *cdh13* is associated with lower  
4 plasma adiponectin levels but greater adiponectin sensitivity in east asian  
5 populations. *Diabetes* 2013;**62**:4277–83. doi:10.2337/db13-0129  
6  
7 44 Matsuzawa Y, Funahashi T, Kihara S, *et al*. Adiponectin and Metabolic Syndrome.  
8 *Arterioscler Thromb Vasc Biol* 2004;**24**:29–33.  
9 doi:10.1161/01.ATV.0000099786.99623.EF  
10 45 Banerjee D, Wong EC, Shin J, *et al*. Racial and Ethnic Variation in Lipoprotein (a)  
11 Levels among Asian Indian and Chinese Patients. *J Lipids* 2011;**2011**:291954.  
12 doi:10.1155/2011/291954  
13 46 Guyton JR, Dahlen GH, Patsch W, *et al*. Relationship of plasma lipoprotein Lp(a)  
14 levels to race and to apolipoprotein B. *Arteriosclerosis* 1985;**5**:265–  
15 72.<http://www.ncbi.nlm.nih.gov/pubmed/3158297>  
16 47 Tsimikas S, Hall JL. Lipoprotein(a) as a potential causal genetic risk factor of  
17 cardiovascular disease: A rationale for increased efforts to understand its  
18 pathophysiology and develop targeted therapies. *J Am Coll Cardiol* 2012;**60**:716–  
19 21. doi:10.1016/j.jacc.2012.04.038  
20  
21  
22  
23  
24  
25  
26  
27  
28  
29  
30  
31  
32  
33  
34  
35  
36  
37  
38  
39  
40  
41  
42  
43  
44  
45  
46  
47  
48  
49  
50  
51  
52  
53  
54  
55  
56  
57  
58  
59  
60

An observational study of the status of coronary risk biomarkers among Negritos with Metabolic Syndrome in East Coast Malaysia

STROBE Statement—checklist of items that should be included in reports of observational studies

| Section                      | Item No | Recommendation                                                                                                                                                                       | Page |
|------------------------------|---------|--------------------------------------------------------------------------------------------------------------------------------------------------------------------------------------|------|
| <b>Title and abstract</b>    | 1       | (a) Indicate the study's design with a commonly used term in the title or the abstract                                                                                               | 1    |
|                              |         | (b) Provide in the abstract an informative and balanced summary of what was done and what was found                                                                                  | 2    |
| <b>Introduction</b>          |         |                                                                                                                                                                                      |      |
| Background/rationale         | 2       | Explain the scientific background and rationale for the investigation being reported                                                                                                 | 4-5  |
| Objectives                   | 3       | State specific objectives, including any prespecified hypotheses                                                                                                                     | 5    |
| <b>Methods</b>               |         |                                                                                                                                                                                      |      |
| Study design                 | 4       | Present key elements of study design early in the paper                                                                                                                              | 5    |
| Setting                      | 5       | Describe the setting, locations, and relevant dates, including periods of recruitment, exposure, follow-up, and data collection                                                      | 5    |
| Participants                 | 6       | <i>Cross-sectional study</i> —Give the eligibility criteria, and the sources and methods of selection of participants                                                                | 5    |
| Variables                    | 7       | Clearly define all outcomes, exposures, predictors, potential confounders, and effect modifiers. Give diagnostic criteria, if applicable                                             | 6-7  |
| Data sources/<br>measurement | 8*      | For each variable of interest, give sources of data and details of methods of assessment (measurement). Describe comparability of assessment methods if there is more than one group | 6-7  |
| Bias                         | 9       | Describe any efforts to address potential sources of bias                                                                                                                            | 5    |
| Study size                   | 10      | Explain how the study size was arrived at                                                                                                                                            | 5    |
| Quantitative variables       | 11      | Explain how quantitative variables were handled in the analyses. If applicable, describe which groupings were chosen and why                                                         | 5-7  |
| Statistical methods          | 12      | (a) Describe all statistical methods, including those used to control for confounding                                                                                                | 7    |
|                              |         | (b) Describe any methods used to examine subgroups and interactions                                                                                                                  | 6-7  |
|                              |         | (c) Explain how missing data were addressed                                                                                                                                          |      |
|                              |         | (d) <i>Case-control study</i> —If applicable, explain how matching of cases and controls was addressed                                                                               | 5-6  |
|                              |         | (e) Describe any sensitivity analyses                                                                                                                                                |      |

Continued on next page

## An observational study of the status of coronary risk biomarkers among Negritos with Metabolic Syndrome in East Coast Malaysia

| <b>Results</b>           |     |                                                                                                                                                                                                                                                                                                                                                                                                               |              |
|--------------------------|-----|---------------------------------------------------------------------------------------------------------------------------------------------------------------------------------------------------------------------------------------------------------------------------------------------------------------------------------------------------------------------------------------------------------------|--------------|
| Participants             | 13* | (a) Report numbers of individuals at each stage of study—eg numbers potentially eligible, examined for eligibility, confirmed eligible, included in the study, completing follow-up, and analysed<br>(b) Give reasons for non-participation at each stage<br>(c) Consider use of a flow diagram                                                                                                               | 7            |
| Descriptive data         | 14* | (a) Give characteristics of study participants (eg demographic, clinical, social) and information on exposures and potential confounders<br>(b) Indicate number of participants with missing data for each variable of interest<br>(c) <i>Cohort study</i> —Summarise follow-up time (eg, average and total amount)                                                                                           | 7-8          |
| Outcome data             | 15* | <i>Cross-sectional study</i> —Report numbers of outcome events or summary measures                                                                                                                                                                                                                                                                                                                            | 7-8          |
| Main results             | 16  | (a) Give unadjusted estimates and, if applicable, confounder-adjusted estimates and their precision (eg, 95% confidence interval). Make clear which confounders were adjusted for and why they were included<br>(b) Report category boundaries when continuous variables were categorized<br>(c) If relevant, consider translating estimates of relative risk into absolute risk for a meaningful time period | 8-10<br>8-10 |
| Other analyses           | 17  | Report other analyses done—eg analyses of subgroups and interactions, and sensitivity analyses                                                                                                                                                                                                                                                                                                                |              |
| <b>Discussion</b>        |     |                                                                                                                                                                                                                                                                                                                                                                                                               |              |
| Key results              | 18  | Summarise key results with reference to study objectives                                                                                                                                                                                                                                                                                                                                                      | 11           |
| Limitations              | 19  | Discuss limitations of the study, taking into account sources of potential bias or imprecision. Discuss both direction and magnitude of any potential bias                                                                                                                                                                                                                                                    | 13           |
| Interpretation           | 20  | Give a cautious overall interpretation of results considering objectives, limitations, multiplicity of analyses, results from similar studies, and other relevant evidence                                                                                                                                                                                                                                    | 11-13        |
| Generalisability         | 21  | Discuss the generalisability (external validity) of the study results                                                                                                                                                                                                                                                                                                                                         | 11-13        |
| <b>Other information</b> |     |                                                                                                                                                                                                                                                                                                                                                                                                               |              |
| Funding                  | 22  | Give the source of funding and the role of the funders for the present study and, if applicable, for the original study on which the present article is based                                                                                                                                                                                                                                                 | 3            |
